# Supplementary material for: A novel group parenting intervention to reduce emotional and behavioural difficulties in young autistic children: protocol for the Autism Spectrum Treatment and Resilience pilot randomised controlled trial
Source: PubMed Central journal article supplement (PMC6597639; doi:10.1136/bmjopen-2019-029959), 2019-06-27
Supplement: bmjopen-2019-029959.draft_revisions.pdf [file bmjopen-2019-029959.draft_revisions.pdf]

# BMJ Open

BMJ Open is committed to open peer review. As part of this commitment we make the peer review history of every article we publish publicly available.

When an article is published we post the peer reviewers' comments and the authors' responses online. We also post the versions of the paper that were used during peer review. These are the versions that the peer review comments apply to.

The versions of the paper that follow are the versions that were submitted during the peer review process. They are not the versions of record or the final published versions. They should not be cited or distributed as the published version of this manuscript.

BMJ Open is an open access journal and the full, final, typeset and author-corrected version of record of the manuscript is available on our site with no access controls, subscription charges or pay-per-view fees (<http://bmjopen.bmj.com>).

If you have any questions on BMJ Open's open peer review process please email [info.bmjopen@bmj.com](mailto:info.bmjopen@bmj.com)

# BMJ Open

**A novel group parenting intervention to reduce emotional and behavioural difficulties in young autistic children: Protocol for the Autism Spectrum Treatment and Resilience (ASTAR) pilot randomised controlled trial.**

|                               |                                                                                                                                                                                                                                                                                                                                                                                                                                                                                                                                                                                                                                                                                                                                                                                                                                                                                                                                                                                                                                                                                                                                                                                                                                                                                                                                                                                                                                                                                                                                                                                                                                                                                                                                                                                                                                                                                                                                                                                                                                                                                                                                                                                                                                                                               |
|-------------------------------|-------------------------------------------------------------------------------------------------------------------------------------------------------------------------------------------------------------------------------------------------------------------------------------------------------------------------------------------------------------------------------------------------------------------------------------------------------------------------------------------------------------------------------------------------------------------------------------------------------------------------------------------------------------------------------------------------------------------------------------------------------------------------------------------------------------------------------------------------------------------------------------------------------------------------------------------------------------------------------------------------------------------------------------------------------------------------------------------------------------------------------------------------------------------------------------------------------------------------------------------------------------------------------------------------------------------------------------------------------------------------------------------------------------------------------------------------------------------------------------------------------------------------------------------------------------------------------------------------------------------------------------------------------------------------------------------------------------------------------------------------------------------------------------------------------------------------------------------------------------------------------------------------------------------------------------------------------------------------------------------------------------------------------------------------------------------------------------------------------------------------------------------------------------------------------------------------------------------------------------------------------------------------------|
| Journal:                      | <i>BMJ Open</i>                                                                                                                                                                                                                                                                                                                                                                                                                                                                                                                                                                                                                                                                                                                                                                                                                                                                                                                                                                                                                                                                                                                                                                                                                                                                                                                                                                                                                                                                                                                                                                                                                                                                                                                                                                                                                                                                                                                                                                                                                                                                                                                                                                                                                                                               |
| Manuscript ID                 | bmjopen-2019-029959                                                                                                                                                                                                                                                                                                                                                                                                                                                                                                                                                                                                                                                                                                                                                                                                                                                                                                                                                                                                                                                                                                                                                                                                                                                                                                                                                                                                                                                                                                                                                                                                                                                                                                                                                                                                                                                                                                                                                                                                                                                                                                                                                                                                                                                           |
| Article Type:                 | Protocol                                                                                                                                                                                                                                                                                                                                                                                                                                                                                                                                                                                                                                                                                                                                                                                                                                                                                                                                                                                                                                                                                                                                                                                                                                                                                                                                                                                                                                                                                                                                                                                                                                                                                                                                                                                                                                                                                                                                                                                                                                                                                                                                                                                                                                                                      |
| Date Submitted by the Author: | 20-Feb-2019                                                                                                                                                                                                                                                                                                                                                                                                                                                                                                                                                                                                                                                                                                                                                                                                                                                                                                                                                                                                                                                                                                                                                                                                                                                                                                                                                                                                                                                                                                                                                                                                                                                                                                                                                                                                                                                                                                                                                                                                                                                                                                                                                                                                                                                                   |
| Complete List of Authors:     | <p>Palmer, Melanie; Institute of Psychiatry, Psychology &amp; Neuroscience, King's College London, Department of Child and Adolescent Psychiatry</p> <p>Tarver, Joanne; Aston University School of Life and Health Sciences, Department of Psychology; University of Birmingham, 3Cerebra Centre for Neurodevelopmental Disorders, School of Psychology</p> <p>Paris Perez, Juan; Institute of Psychiatry, Psychology &amp; Neuroscience, King's College London, Department of Child and Adolescent Psychiatry</p> <p>Cawthorne, Thomas; Institute of Psychiatry, Psychology &amp; Neuroscience, King's College London, Department of Child and Adolescent Psychiatry</p> <p>Romeo, Renee; Institute of Psychiatry, Psychology &amp; Neuroscience, King's College London, Department of Health Service and Population Research</p> <p>Stringer, Dominic; Institute of Psychiatry, Psychology &amp; Neuroscience, King's College London, Department of Biostatistics and Health Informatics</p> <p>Hallett, Victoria; South London and Maudsley NHS Foundation Trust</p> <p>Mueller, Joanne; South London and Maudsley NHS Foundation Trust</p> <p>Breese, Lauren; South London and Maudsley NHS Foundation Trust</p> <p>Hollett, Megan; South London and Maudsley NHS Foundation Trust</p> <p>Beresford, Bryony; University of York, Social Policy Research Unit</p> <p>Knapp, Martin; London School of Economics, Personal Social Services Research Unit</p> <p>Slonims, Vicky; Guy's and St Thomas' NHS Foundation Trust, Evelina Children's Hospital</p> <p>Pickles, Andrew; Institute of Psychiatry, Psychology &amp; Neuroscience, King's College London, Department of Biostatistics and Health Informatics</p> <p>Simonoff, Emily; Institute of Psychiatry, Psychology &amp; Neuroscience, King's College London, Department of Child and Adolescent Psychiatry; South London and Maudsley NHS Foundation Trust</p> <p>Scott, Stephen; Institute of Psychiatry, Psychology &amp; Neuroscience, King's College London, Department of Child and Adolescent Psychiatry; South London and Maudsley NHS Foundation Trust</p> <p>Charman, Tony; King's College London, Institute of Psychiatry, Department of Psychology; South London and Maudsley NHS Foundation Trust</p> |
| Keywords:                     | Autism, Emotional and Behavioural Difficulties, Parenting Intervention,                                                                                                                                                                                                                                                                                                                                                                                                                                                                                                                                                                                                                                                                                                                                                                                                                                                                                                                                                                                                                                                                                                                                                                                                                                                                                                                                                                                                                                                                                                                                                                                                                                                                                                                                                                                                                                                                                                                                                                                                                                                                                                                                                                                                       |

1  
2  
3  
4  
5  
6  
7  
8  
9  
10  
11  
12  
13  
14  
15  
16  
17  
18  
19  
20  
21  
22  
23  
24  
25  
26  
27  
28  
29  
30  
31  
32  
33  
34  
35  
36  
37  
38  
39  
40  
41  
42  
43  
44  
45  
46  
47  
48  
49  
50  
51  
52  
53  
54  
55  
56  
57  
58  
59  
60

|  |                        |
|--|------------------------|
|  | Feasibility, Pilot RCT |
|  |                        |

SCHOLARONE™  
Manuscripts

1  
2  
3 **TITLE:** A novel group parenting intervention to reduce emotional and behavioural  
4 difficulties in young autistic children: Protocol for the Autism Spectrum Treatment and  
5 Resilience (ASTAR) pilot randomised controlled trial.  
6  
7  
8  
9

10  
11  
12 **AUTHORS:**  
13

14 Melanie Palmer<sup>1</sup>, Joanne Tarver<sup>2,3</sup>, Juan Paris Perez<sup>1</sup>, Thomas Cawthorne<sup>1</sup>, Renee Romeo<sup>1</sup>,  
15 Dominic Stringer<sup>1</sup>, Victoria Hallett<sup>4</sup>, Joanne Mueller<sup>4</sup>, Lauren Breese<sup>4</sup>, Megan Hollett<sup>4</sup>,  
16 Bryony Beresford<sup>5</sup>, Martin Knapp<sup>6</sup>, Vicky Slonims<sup>7</sup>, Andrew Pickles<sup>1</sup>, Emily Simonoff<sup>1,4</sup>,  
17 Stephen Scott<sup>1,4</sup> and Tony Charman<sup>1,4</sup>.  
18  
19  
20  
21  
22  
23

24  
25  
26 **AUTHOR AFFILIATIONS:**  
27

28 <sup>1</sup>King's College London, Institute of Psychiatry, Psychology & Neuroscience, London, UK.  
29

30 <sup>2</sup>Department of Psychology, School of Life and Health Sciences, Aston University,  
31 Birmingham, UK  
32

33 <sup>3</sup>Cerebra Centre for Neurodevelopmental Disorders, School of Psychology, University of  
34 Birmingham, Birmingham, UK  
35

36 <sup>4</sup>South London and Maudsley NHS Foundation Trust, London, UK  
37

38 <sup>5</sup>Social Policy Research Unit, University of York, York, UK  
39

40 <sup>6</sup>Department of Health Policy, London School of Economics and Political Science, London,  
41 UK  
42

43 <sup>7</sup>Newcomen Neurodevelopmental Centre, Children's Neurosciences, Evelina Children's  
44 Hospital, Guy's and St Thomas NHS Foundation Trust, London, UK.  
45  
46  
47  
48  
49  
50  
51  
52  
53  
54  
55  
56  
57  
58  
59  
60

**CORRESPONDING AUTHOR:**

The corresponding author, Melanie Palmer, can be contacted via email at

[melanie.palmer@kcl.ac.uk](mailto:melanie.palmer@kcl.ac.uk), or by telephone on +44 (0) 207 848 5260.

**ORCID NUMBERS:**

|                  |                     |
|------------------|---------------------|
| Melanie Palmer   | 0000-0001-5579-2170 |
| Joanne Tarver    | 0000-0003-0555-6043 |
| Juan Paris Perez | 0000-0003-3171-0315 |
| Thomas Cawthorne | 0000-0003-4537-0016 |
| Renee Romeo      | 0000-0003-3871-9697 |
| Dominic Stringer | 0000-0001-5624-1733 |
| Victoria Hallett | 0000-0002-7432-9824 |
| Joanne Mueller   | 0000-0003-2737-1883 |
| Lauren Breese    | 0000-0002-1246-7703 |
| Megan Hollett    | 0000-0003-3123-1867 |
| Bryony Beresford | 0000-0003-0716-2902 |
| Martin Knapp     | 0000-0003-1427-0215 |
| Vicky Slonims    | 0000-0003-3339-2365 |
| Andrew Pickles   | 0000-0003-1283-0346 |
| Emily Simonoff   | 0000-0002-5450-0823 |
| Stephen Scott    | 0000-0003-4680-6213 |
| Tony Charman     | 0000-0003-1993-6549 |

## ABSTRACT

**Introduction:** The majority of young autistic children display impairing emotional and behavioural difficulties that contribute to family stress. There is some evidence that behavioural parenting interventions are effective for reducing behavioural difficulties in autistic children, with less evidence assessing change in emotional difficulties. Previous trials have tended to use unblinded parent-report measures as primary outcomes and many do not employ an active control, limiting the conclusions that can be drawn.

**Methods and analysis:** The Autism Spectrum Treatment and Resilience (ASTAR) study is a pilot randomised controlled trial (RCT) testing the specific effect of a 12-week group parenting intervention (Predictive Parenting) on primary and secondary outcomes, in comparison to an attention control condition consisting of psychoeducation parent groups. Following a feasibility study to test research procedures and the interventions, the pilot RCT participants include 60 parents of 4-8 year old autistic children who are randomised to Predictive Parenting versus the attention control. Measures are administered at baseline and post-intervention to assess group differences in the child and parent outcomes, costs and service use, and adverse events. The primary outcome is an objective measure of child behaviour that challenges during interactions with their parent and a researcher. The trial aims to provide data on recruitment, retention, completion of measures and acceptability of the intervention and research protocol, in addition to providing a preliminary indication of potential efficacy and establishing an effect size that could be used to power a larger-scale efficacy trial. We will also provide preliminary estimates of the cost-effectiveness of the interventions.

**Ethics and dissemination:** Ethical approval was granted from NHS Camden and Kings Cross Research Ethics Committee (ref: 16/LO/1769) along with NHS R&D approval from South London and Maudsley, Guy's and St Thomas', and Croydon Health Services NHS

1  
2  
3 Trusts. The findings will be disseminated through publication in peer-reviewed journals and  
4  
5 presentations at conferences.  
6

7  
8 **Trial registration number:** ISRCTN91411078.  
9

10  
11  
12 **Strengths and limitations of the study:**  
13

- 14
- 15 • The trial uses an objective measure as the primary outcome overcoming biases  
16 associated with participants being unblinded to treatment status.  
17
  - 18 • The target intervention, developed by clinicians with expertise in autism, is compared  
19 to an attention control condition to further guard against placebo effects.  
20
  - 21 • A feasibility study with nested qualitative evaluation enabled refinement of the  
22 intervention and research procedures prior to commencing the pilot RCT.  
23
  - 24 • Parents and autistic adults, referred to as patient and public involvement (PPI) panels,  
25 were involved in the development of the interventions and research procedures.  
26
  - 27 • As the study is a pilot RCT, conclusions about the efficacy of the intervention are not  
28 possible.  
29  
30  
31  
32  
33  
34  
35  
36  
37  
38  
39

40 **Keywords:** Autism; Emotional and Behavioural Difficulties; Parenting Intervention;  
41  
42 Feasibility; Pilot RCT.  
43  
44  
45  
46  
47  
48  
49  
50  
51  
52  
53  
54  
55  
56  
57  
58  
59  
60

## INTRODUCTION

### Background

Autism is characterised by difficulties in reciprocal social communication and the presence of restricted interests, repetitive behaviours and sensory anomalies.(1) At least 1% of children are autistic(2-4) and the condition is around three to four times more prevalent in males than females.(5) There are high rates of intellectual disability in autistic children with approximately 55% having an IQ below 70.(6) It has been demonstrated that additional psychiatric disorders frequently co-occur with autism at rates much higher than in the general population; up to 80-90% of young autistic children have additional emotional or behavioural difficulties meeting formal diagnostic criteria, with many having two or more additional disorders.(7-9) Anxiety disorders, attention deficit/hyperactivity disorder, and opposition defiant disorder are most common, and these difficulties tend to persist over time.(10)

Parents often report that it is these co-occurring difficulties, which are associated with poorer parental wellbeing and parental stress,(11) that they would like support with.

Universal interventions are warranted given the high prevalence of co-occurring emotional and behavioural difficulties in autistic children. However, current service provision in the United Kingdom usually includes the offer of psychoeducation groups that focus on teaching parents about autism and developing strategies to support social and communication functioning, rather than the commonly co-occurring emotional and behavioural difficulties.

Behavioural parenting interventions are recommended by the National Institute of Health and Care Excellence(12) for the treatment of behavioural difficulties displayed by young children without autism. There are a number of effective parenting interventions that aim to reduce such difficulties in young autistic children. A recent meta-analysis of eight randomised controlled trials (RCTs) of behavioural parenting interventions aiming to reduce disruptive behaviour displayed by young autistic children(13) found a moderate effect on



1  
2  
3 disruptive behaviour when compared to controls (Standardised Mean Difference=-0.59, 95%  
4 confidence interval [CI] -0.88, -0.30). However, there was significant heterogeneity in the  
5 effect of parenting interventions on disruptive behaviour which may be due to sample size,  
6 mode of delivery and the focus and duration of treatment. Only one RCT included in the  
7 review involved anxiety management techniques even though anxiety disorders are the most  
8 common co-occurring psychiatric diagnoses in autism and “behaviour that challenges” is  
9 often described as an observable manifestation of anxiety.(14,15) A recent meta-analysis of  
10 14 RCTs of cognitive behavioural therapy (CBT) interventions for anxiety in young autistic  
11 children, most of which included parental components, demonstrated that reductions in  
12 anxiety could be achieved.(16)

13  
14  
15  
16  
17  
18  
19  
20  
21  
22  
23  
24  
25  
26 In addition, only one parenting intervention reviewed by Postorino et al.(13) included  
27 group-based sessions for parents, even though groups are more scalable and have the added  
28 benefit of providing a support network for parents. More than half of the included RCTs  
29 compared parenting interventions to a waitlist control or care as usual,(13) limiting  
30 conclusions that can be drawn about the effects as participants would not be blind to  
31 treatment allocation. Being unblinded to treatment allocation is particularly problematic when  
32 self-report measures are used as primary outcomes,(17) and there is a need for objective  
33 blinded measures of behaviour to be used as outcome measures in trials aiming to reduce  
34 emotional and behavioural difficulties displayed by young autistic children.

### 35 36 37 38 39 40 41 42 43 44 45 46 47 **Aims and objectives**

48  
49 The Autism Spectrum Treatment and Resilience (ASTAR) trial is part of a research  
50 programme that aims to improve mental health outcomes among autistic individuals  
51 (Improving Autism Mental Health: <https://iamhealthkcl.net/>). ASTAR tests the specific effect  
52 of the Predictive Parenting intervention on child emotional and behavioural difficulties, in  
53 comparison to an attention control condition (psychoeducation parent groups). The aims of  
54  
55  
56  
57  
58  
59  
60

1  
2  
3 the ASTAR trial are to: (1) examine the feasibility of the intervention in terms of recruitment,  
4 retention, completion of research measures and acceptability to parents; (2) provide a  
5 preliminary indication of potential efficacy on the primary and secondary outcomes and  
6  
7 establish an effect size that could be used to power a future larger scale RCT; and (3) provide  
8 preliminary estimates of the cost-effectiveness of the intervention to inform a larger trial.  
9  
10  
11  
12  
13

14  
15 Consistent with Medical Research Council guidance on evaluating complex  
16 interventions,(18) we first conducted a preliminary feasibility phase testing the proposed  
17 research procedures and the Predictive Parenting (target intervention) and psychoeducation  
18 (control) group interventions with families with a 4-8 year old autistic child. A nested  
19 qualitative evaluation was conducted to explore the views of parents who declined to take  
20 part, those who completed/dropped-out of the interventions and the group facilitators.  
21 Findings from the feasibility phase were used to amend the research procedures and  
22 intervention manuals prior to the subsequent pilot RCT (see below for further information on  
23 learning from the feasibility phase).  
24  
25  
26  
27  
28  
29  
30  
31  
32  
33  
34

35 The primary outcome of the pilot RCT is observed child behaviour that challenges,  
36 captured during a structured researcher- and parent-child interaction assessment (see  
37 description of measure below for further details). Secondary outcomes are child compliance  
38 and child-centred and child-directive parenting captured from the same observation and  
39 parent- and teacher-report of child emotional and behavioural difficulties. We are also  
40 measuring the effects of the interventions on parental stress and wellbeing, parenting  
41 practices and parenting self-efficacy.  
42  
43  
44  
45  
46  
47  
48  
49  
50

## 51 **METHODS AND ANALYSIS**

### 52 **Learning from the feasibility phase**

53  
54 The aim of the feasibility phase was to test the proposed recruitment processes and  
55 rates, the adequacy and acceptability of proposed measures and obtain the views of parents  
56  
57  
58  
59  
60

1  
2  
3 and professionals on the research processes and interventions. Participants were 22 families  
4  
5 (91% mothers and 9% fathers) with a 4-8 year old child with a clinical diagnosis of autism  
6  
7 spectrum disorder. All but one of the children were male, and children were split across  
8  
9 mainstream ( $n=10$ ) and two special schools ( $n=12$ ). Children in the special schools groups  
10  
11 attended either a mixed autism-specific special school or a special school catering for  
12  
13 children with severe learning difficulties co-occurring with autism. As intervention content is  
14  
15 differentiated by child verbal ability, parents of minimally verbal children ( $n=12$ ) attended  
16  
17 groups separately from parents of verbal children ( $n=10$ ).  
18  
19  
20  
21

22 We recruited 22 out of our target of 24 (92%) for the feasibility phase and we retained  
23  
24 20/22 (91%) families in the research protocol to post-intervention, indicating that the research  
25  
26 processes were acceptable to families. All 22 parents gave consent for their child's teacher to  
27  
28 complete measures. Baseline teacher questionnaires were obtained for 20/22 (91%) children  
29  
30 and retention of teachers at post-intervention was high (18/22, 82%).  
31  
32

33 Parents who were interviewed reported that the research procedures were acceptable,  
34  
35 although some felt the assessment process was lengthy. Prior to commencing the pilot RCT,  
36  
37 two proposed outcome measures were removed to reduce burden on families (see our  
38  
39 ISRCTN record for a log of outcome measures tested during the feasibility phase). For some  
40  
41 parents, there appeared to have been a lack of clarity about the difference between the  
42  
43 research and clinical teams and who they would have contact with at each stage of the study.  
44  
45 This led to amendments in the information given to parents to help make this distinction  
46  
47 clearer. Findings from the qualitative interviews indicated that most parents reported that they  
48  
49 found the groups helpful and that they enjoyed meeting other parents in a similar situation.  
50  
51 Feedback on the structure, timing, course materials and homework led to modifications to the  
52  
53 Predictive Parenting intervention. For example, changes were made to make the groups more  
54  
55 accessible and relevant to parents of children with lower levels of verbal ability. The study  
56  
57  
58  
59  
60

1  
2  
3 design was also amended by increasing the number of families in each group (from six to  
4  
5 eight) as it was a more efficient way to recruit and deliver the interventions. The increased  
6  
7 group size was not thought to disrupt the intervention; indeed the slightly larger sizes may be  
8  
9 helpful for group dynamics. Further details on the feasibility study can be provided upon  
10  
11 contact with the research team.  
12  
13

### 14 **Patient and Public Involvement (PPI)**

15  
16  
17 Panels of parents of autistic children and autistic adults have been involved in all  
18  
19 phases of the study and assisted with the development of the intervention curriculums and  
20  
21 adaptations for parents of minimally verbal children, as well as advising on the research  
22  
23 procedures. Guidance and advice about language to use when speaking with parents about the  
24  
25 therapy goals and research processes (including on the written materials such as flyers and  
26  
27 information sheets) was given.  
28  
29

### 30 **Trial design**

31  
32  
33 The study is a parallel group pilot RCT. Participating families are allocated to one of  
34  
35 two treatment arms (Predictive Parenting or psychoeducational parent groups).  
36  
37 Randomisation is conducted on blocks of 10-18 families on a ratio of 1:1, resulting in groups  
38  
39 of 5-9 families in each treatment arm for any block. The randomisation algorithm is run by an  
40  
41 independent statistician within the Biostatistics and Health Informatics Department, IoPPN,  
42  
43 King's College London. Details of this are recorded in a separate randomisation specification  
44  
45 document. Intervention allocation is emailed only to the group facilitators to ensure that the  
46  
47 researchers are blind to condition.  
48  
49

50  
51 Measures are collected at baseline, up to 2 months prior to the planned randomisation  
52  
53 date, and approximately 18-24 weeks after randomisation once the 12-week intervention has  
54  
55 finished. Group differences in outcomes will be examined.  
56  
57

### 58 **Inclusion criteria**

- Parent/carer of an autistic child, as confirmed by their clinician, aged between 4:0 years and 8:11 years
- Have sufficient spoken English to access the intervention
- Agree that their family doctor can be informed of their involvement in the trial.

### **Exclusion criteria**

- Current participation in a behavioural parenting intervention delivered by another service
- Child has epileptic seizures more than weekly
- Parent or child has a severe hearing or visual impairment
- Active significant safeguarding concerns or a current severe parental psychiatric disorder
- Participation in the initial feasibility phase.

### **Interventions**

#### **Predictive Parenting (target intervention)**

Predictive Parenting builds on behavioural parenting interventions, an evidence-based, well-accepted and cost-effective approach to targeting disruptive behaviour in children without autism.(12) It also incorporates well-established parent-mediated cognitive-behavioural therapy strategies for managing child anxiety.(16) It consists of 12 weekly 2-hour groups which extend parents' understanding of autism and associated difficulties and focus on supporting parents to understand and manage their child's emotions and behaviours (see Table 1 for content covered in Predictive Parenting). Techniques for helping parents prevent and reduce disruptive behaviour and anxiety are taught. It also includes content on promoting parental self-care and stress reduction. Content is adapted based on child verbal ability (minimally verbal vs. verbal). In addition to the 12 group sessions, two individual sessions are conducted- one between sessions 2 and 4 and the other between sessions 10 and

12. These individual sessions are up to 60 minutes long and aim to support individualisation and generalisation of the strategies for each family. The intervention is conducted in the community in local child and adolescent mental health services, libraries, or schools. Further information about Predictive Parenting will be published in a separate manuscript.

Table 1. Table displaying the content covered in Predictive Parenting

| Group session | Content                                      |
|---------------|----------------------------------------------|
| 1             | Understanding ASD                            |
| 2             | Becoming a Behaviour Predictor               |
| 3             | The Power of Planning                        |
| 4             | Predictably Positive Household               |
| 5             | Clever Communication                         |
| 6             | Predictable Praise and Rewards               |
| 7             | Managing Challenging Behaviour and Meltdowns |
| 8             | Predictable Parent Action Plans              |
| 9             | Understanding Anxiety                        |
| 10            | Anxiety and Unpredictability Toolkit 1       |
| 11            | Anxiety and Unpredictability Toolkit 2       |
| 12            | Looking Forward and Looking After Yourself   |

Psychoeducational parent group (attention control condition)

The ‘Seven Cs of ASD’, the attention control condition, also consists of 12 weekly 2-hour groups that aim to provide psychoeducation and social support, whilst not providing specific guidance on managing behaviours or emotions. Table 2 below displays the content covered in each session of The Seven Cs of ASD. Like Predictive Parenting, content is adapted based on child verbal ability.

Table 2. Table displaying the content covered in The Seven Cs of ASD

| Group session | Content                                     |
|---------------|---------------------------------------------|
| 1             | Introduction and understanding ASD          |
| 2             | Causes of ASD                               |
| 3             | Concepts in ASD                             |
| 4             | Caring for yourself and your family: Part 1 |
| 5             | Caring for yourself and your family: Part 2 |
| 6             | Co-morbidities in ASD: Part 1               |
| 7             | Co-morbidities in ASD: Part 2               |
| 8             | Clinical treatments for ASD                 |
| 9             | Communication and advocating for your child |

|    |                                             |
|----|---------------------------------------------|
| 10 | Classroom considerations                    |
| 11 | Caring for yourself and your family: Part 3 |
| 12 | Recap and review                            |

## Intervention adherence

Detailed intervention manuals have been developed and frequent clinical supervision is provided to reduce variability due to therapist effects. Checklists have been developed to measure intervention fidelity, which assess session content and group process. These are completed by the group facilitators after each intervention session.

## Sample size justification

As this is a pilot RCT, a formal sample size calculation was not undertaken. We are recruiting 60 families into the pilot RCT. We expect that retention will be approximately 90%, as reported by other trials of psychological intervention conducted with parents of young autistic children. We expect a more modest effect size than the 1.3 reported by Sofronoff et al.(19) as this was for a parent-reported measure and therefore unblinded. For the comparison of Predictive Parenting and the attention control condition, power was calculated by a non-central chi-square method using a linear mixed model with baseline (baseline-outcome correlation assumed 0.7) as covariate for two-tailed  $p=.05$  and intraclass correlation for within intervention group of 0.02 and 10% drop-out. For an effect size (ES) of 0.5, our study has an expected 95% CI of 0.08, 0.92 and power of 64%, while for an ES of 0.6 the expected 95% CI is 0.18, 1.02 and 79% power.

## Outcomes

Table 3 below displays measures that are being used in the trial and when they are administered.

### Primary outcome

The primary outcome measure is child behaviour that challenges displayed during an observation of researcher-child and parent-child interactions. We have developed the

1  
2  
3 Observation Schedule for Children with Autism – Anxiety and Behaviour (OSCA–AB) for  
4 the trial drawing on existing well-validated observational measures of parent-child  
5 interaction.(20-23) Two researcher-led and six parent-led tasks are completed during the 20-  
6 25 minute observation. Tasks aim to simulate everyday challenges that autistic children may  
7 face and find difficult. The frequency of a range of child behaviour that challenges  
8 (destructive behaviour, aggression towards themselves and others, frustrated vocalisations,  
9 non-compliance, avoidance and reassurance seeking) observed during the OSCA–AB are  
10 coded. As the length of the observation varies, the rate of child behaviour that challenges per  
11 minute is calculated. Further information about the measure will be published in a separate  
12 manuscript.  
13  
14  
15  
16  
17  
18  
19  
20  
21  
22  
23  
24  
25

## 26 Secondary outcomes

### 27 *Observed child compliance*

28  
29  
30 The frequency of observed child compliance during the OSCA–AB is coded and the  
31 rate of child compliance per minute is calculated.  
32  
33  
34

### 35 *Observed parent behaviour*

36  
37  
38 Frequencies of a range of observed parent behaviour (e.g., positive and negative  
39 comments, commands, giving the child opportunity to comply, praise, physical handling and  
40 supportive physical guidance) during the OSCA-AB are coded and differences between  
41 groups will be examined. Child-centred parenting behaviours (positive comments, clear  
42 commands, praise and supportive physical guidance) and child-directive parenting behaviours  
43 (negative comments, unclear commands, no opportunity to comply and physical handling)  
44 are summed to produce total child-centred parenting behaviour and child-directive parenting  
45 behaviour scores. Due to variation in the length of the observation, rates of child-centred and  
46 child-directive parenting behaviours per minute are calculated. The proportion of child-  
47  
48  
49  
50  
51  
52  
53  
54  
55  
56  
57  
58  
59  
60



1  
2  
3 centred parenting behaviour / child-centred and child-directive parenting behaviours is also  
4  
5 calculated.

6  
7  
8 *Parent-reported child emotional and behavioural difficulties*

9  
10 Parent-rated child emotional and behavioural difficulties is measured using The  
11  
12 Aberrant Behaviour Checklist (ABC)(24) Irritability and Hyperactivity subscales. The  
13  
14 Assessment of Concerning Behaviours (ACB) scale,(25) a measure of child mental health  
15  
16 and concerning behaviours developed specifically for use with autistic individuals, is also  
17  
18 completed. Forty-four items are rated on a 5-point sliding scale anchored by opposing  
19  
20 responses ('not at all' and 'very much'). The Home Situations Questionnaire-Autism  
21  
22 Spectrum Disorders (HSQ-ASD),(26) an autism-specific measure of child non-compliance in  
23  
24 everyday situations is also administered. Parent-reported child anxiety is measured using the  
25  
26 Preschool Anxiety Scale Revised (PASR),(27) which taps into specific fears, and generalised,  
27  
28 social and separation anxiety.  
29  
30  
31

32  
33 A narrative describing one or two of the most pressing problems for parents related to  
34  
35 child emotions and behaviours (Parent-Nominated Target Problems) is elicited at baseline.  
36  
37 Information on the presentation, frequency, duration, intensity and interference with daily  
38  
39 function, family life and other consequences is sought.(28) The narratives are reviewed at  
40  
41 post-intervention and change from baseline is scored on a 9-point scale. The Clinical Global  
42  
43 Impression-Improvement (CGI-I)(29) is used to rate overall improvement in child emotional  
44  
45 and behavioural difficulties based on the parent-nominated target problems and parental  
46  
47 perceptions of improvement.  
48  
49

50  
51 *Teacher-reported child emotional and behavioural difficulties*

52  
53 The ABC(24) Irritability and Hyperactivity subscales is completed by the child's  
54  
55 teacher or someone involved in their education (e.g., key worker, Special Educational Needs  
56  
57 Co-ordinator). The teacher version of the ACB(25) is also completed.  
58  
59  
60

### *Parent-reported parenting outcomes*

Parent-rated parenting stress associated with core and co-morbid symptoms is measured using the Autism Parenting Stress Index (APSI)(30) and parenting self-efficacy is measured using the Child Adjustment and Parent Efficacy Scale-Developmental Disability (CAPES-DD) Parent Efficacy subscale,(31) a 16-item scale assessing confidence in managing specific child behaviours. The Short Warwick-Edinburgh Mental Wellbeing Scale (SWEMWBS)(32) assesses parent reports of their own wellbeing. The short version of the Parenting Scale (PS)(33) is used to measure self-reported lax and overreactive parenting practices.

### Sample characterisation measures

Demographic information about the family is obtained at baseline. Autism severity is measured at baseline only using the parent-reported Social Communication Questionnaire-Lifetime version (SCQ-L)(34), along with the ADOS-2.(35) The ADOS-2 is the gold standard observation for assessing autism symptoms and is administered by trained researchers. The Adaptive Behaviour Assessment System – 3<sup>rd</sup> edition (ABAS-3)(36) is completed by parents at baseline and measures three broad domains of adaptive skills and functioning (conceptual, social and practical), resulting in a General Adaptive Composite score.

### Intervention related measures

Attendance at intervention sessions and retention in the intervention is recorded. Satisfaction with the content and delivery of both interventions is measured using questionnaires developed for study.

### Health economic measures

Parental wellbeing and daily emotions are measured using the Office of National Statistics (ONS) Personal Wellbeing questions(37) which ask about life satisfaction, worth,

happiness, and anxiety. The EQ-5D-5L(38) is used to measure parent reports of their own health-related quality of life, and index-based values are available to enable quality-adjusted life years (QALYs) calculations to be used in the cost-effectiveness analysis.

An adapted version of the Client Service Receipt Inventory (CSRI)(39) measures service use and cost-related impacts at baseline and post-intervention, to inform the cost-effectiveness analysis. Parents are asked to retrospectively identify all public, private and voluntary sector services used by the child, as well as services used by other family members that are linked to the child's autism or emotional and behavioural difficulties. The CSRI also includes information on unpaid support and employment impacts on other family members. The facilitators delivering the interventions track their time spent on intervention-related activities and travel costs to be used in costing the interventions.

Table 3. Table showing administration of measures.

| Measure                                         | Baseline | During treatment | Post-intervention | Completed by              |
|-------------------------------------------------|----------|------------------|-------------------|---------------------------|
| <b>Primary outcome</b>                          |          |                  |                   |                           |
| OSCA-AB Child Behaviour That Challenges         | ✓        |                  | ✓                 | Blinded researcher        |
| <b>Secondary outcomes</b>                       |          |                  |                   |                           |
| OSCA-AB Child Compliance                        | ✓        |                  | ✓                 | Blinded researcher        |
| OSCA-AB Child-Centred Parenting Behaviour       | ✓        |                  | ✓                 | Blinded researcher        |
| OSCA-AB Child-Directive Parenting Behaviour     | ✓        |                  | ✓                 | Blinded researcher        |
| ABC Irritability and Hyperactivity              | ✓        |                  | ✓                 | Parent/teacher            |
| ACB                                             | ✓        |                  | ✓                 | Parent/teacher            |
| HSQ-ASD                                         | ✓        |                  | ✓                 | Parent                    |
| PASR                                            | ✓        |                  | ✓                 | Parent                    |
| Improvement in Parent-Nominated Target Problems | ✓        |                  | ✓                 | Parent/blinded researcher |
| CGI-I                                           | ✓        |                  | ✓                 | Parent/blinded researcher |
| APSI                                            | ✓        |                  | ✓                 | Parent                    |



1  
2  
3 and verbal children within each of our localities. Therefore, the blocks of 10-18 families  
4 recruited for allocation to condition will be stratified by verbal ability level (minimally verbal  
5 [defined as Autism Diagnostic Observation Schedule – 2<sup>nd</sup> edition, ADOS–2(35) Module 1]  
6 vs. verbal children [defined as ADOS–2 Module 2 or above]) and by locality (Croydon,  
7 Bromley) as part of the recruitment procedure.  
8  
9  
10  
11  
12  
13

14  
15 After initial contact and pre-screening for eligibility, research staff obtain informed  
16 consent and conduct baseline assessments to confirm eligibility. All families are assigned a  
17 unique participant ID. Questionnaire measures are completed online or in hard copy  
18 depending on the parent’s preference. Other measures are completed during a visit to the  
19 research setting, over the phone or at the child’s school. Baseline assessments with families  
20 are conducted up to 2 months prior to randomisation. With parental consent, teachers are  
21 asked to complete questionnaires about the child’s emotional and behavioural difficulties at  
22 school. Post-intervention assessments are conducted after the completion of the intervention.  
23 Outcome measures are sought for all families regardless of their participation in the treatment  
24 provided.  
25  
26  
27  
28  
29  
30  
31  
32  
33  
34  
35  
36  
37

38 There are separate research and clinical teams who are based in different buildings  
39 and have separate supervision structures. The assessments and interventions are conducted in  
40 a way to avoid inadvertent divulging of information that could reveal allocation status. The  
41 location and materials used during the research assessments are different in type and location  
42 to those used for the intervention sessions, avoiding any familiarity effect for parents.  
43 Researchers involved in conducting the assessments and rating outcome measures are blind to  
44 intervention content and participant condition. Group facilitators are blind to primary  
45 outcome measurement.  
46  
47  
48  
49  
50  
51  
52  
53  
54  
55

#### 56 **Data management, confidentiality and access**

57  
58  
59  
60

1  
2  
3 All data in the trial are anonymised. All paper records are filed anonymously by the  
4 participant's unique study number in secure locked cabinets in the Department of Child and  
5 Adolescent Psychiatry, IoPPN, King's College London. Consent forms are stored separately.  
6  
7 Personal details (e.g., name, address, telephone numbers) are stored in a separate encrypted  
8 database and linked by initial, date of birth and unique participant ID number. Some records  
9  
10 from the feasibility phase are stored securely at York University.  
11  
12  
13  
14  
15  
16

17  
18 Data from paper case report forms are entered on SPSS databases and along with  
19 other electronic data, stored on a King's server folder that is only accessible to the research  
20 team. Double data entry will be completed on at least 10% of all entered data and quality  
21 checks will be conducted. The principal investigator, trial statisticians and other members of  
22 the study team have access to final datasets and will undertake analysis as appropriate and  
23 necessary. Any arrangements for other researchers to have access to the data will be  
24 negotiated separately and the Central Office of Research Ethics Committee will be informed.  
25  
26  
27  
28  
29  
30  
31  
32

### 33 **Statistical analyses**

34  
35  
36 A statistical analysis plan has been written by the trial statisticians (AP and DS) and  
37 approved by the chief investigator, the Trial Steering Committee (TSC) and the Data  
38 Monitoring Committee (DMC) prior to any analysis being undertaken. The analyses will be  
39 carried out using Stata.  
40  
41  
42  
43  
44

45  
46 In accordance with CONSORT guidelines, we will report the flow of participants  
47 through the trial. Descriptive statistics of recruitment, drop-out and completeness of  
48 assessments and interventions will be provided. Satisfaction and fidelity of the intervention  
49 will also be reported descriptively. Baseline characteristics will be presented by group.  
50  
51  
52  
53

54  
55 The main analysis will be via intention-to-treat, including all participants who were  
56 randomised. It will use statistical techniques for handling missing outcome data under a  
57 missing at random assumption and multiple imputation for missing measures will be  
58  
59  
60

1  
2  
3 considered. We will test for a between-group change in the primary outcome at post-  
4  
5 intervention, using ANCOVA regression predicting outcome where post-intervention is also  
6  
7 covaried for baseline. Dummy variables will be used to account for randomisation  
8  
9 stratification and the clustering effects of groups. The distribution of the primary outcome at  
10  
11 baseline will be examined for evidence of floor effects. Where floor effects are present, a  
12  
13 generalised mixed model/structural equation modelling setup, in which both baseline and  
14  
15 post-intervention are modelled as potentially censored response variables, will be used with a  
16  
17 covariance between equations that yields the ANCOVA estimate of treatment effect in the  
18  
19 absence of censoring. Secondary outcome measures will be analysed in the same way.  
20  
21  
22 Analysis of all post-intervention treatment effects will be undertaken after all post-  
23  
24 intervention outcome measures are completed. Trial statisticians will remain blind until after  
25  
26 the primary and secondary outcomes are analysed.  
27  
28  
29

### 30 Economic evaluation

31  
32  
33 The cost for each participant in the pilot will be derived by the product of the quantity  
34  
35 of each service and support used and the unit cost of each of them. Unit costs will be based  
36  
37 on the economic notion of opportunity costs – which considers the value of the resource in its  
38  
39 next best alternative use. Where this is not practicable, unit costs will be approximated by  
40  
41 nationally representative health and personal social services tariffs. Where unit costs are not  
42  
43 readily available from such sources, we will derive costs using approaches outlined in an  
44  
45 annual compendium of Unit Cost of Health and Social Care. We will use the most recent  
46  
47 publication of the *Unit Cost of Health and Social Care* produced by the Personal Social  
48  
49 Services Research Unit at the time of analysis. All other reported costs will be consistent with  
50  
51 the price level used in that edition.(40)  
52  
53  
54

55  
56 When applying unit costs to unpaid care, we will use other approaches such as  
57  
58 replacement costs. Under this approach, unpaid care by family and other carers will be costed  
59  
60

1  
2  
3 using the average hourly rate for a local authority home care worker as the assumed cost for  
4  
5 each hour of unpaid informal care.  
6  
7

8 Consistent with the outcome analyses, the economic evaluation will also conduct an  
9  
10 intention-to-treat analysis, including all participants who were randomised. We will compute  
11  
12 and compare comprehensively measured costs (for each of the two perspectives adopted:  
13  
14 health and social care, public sector or societal) for the two interventions. Under each  
15  
16 perspective, the cost-effectiveness analyses will bring together costs and the primary outcome  
17  
18 and will compute indicative incremental cost-effectiveness ratios and net benefits; the  
19  
20 societal perspective will be adopted in the main analyses. In a secondary economic  
21  
22 evaluation, QALY gains computed from parental EQ-5D-5L scores will be compared with  
23  
24 costs from each perspective; again, the societal perspective will be adopted to facilitate  
25  
26 comparisons with the main analyses. Other exploratory cost-effectiveness analyses will  
27  
28 examine other outcomes and perspectives.  
29  
30  
31  
32

33 In each case, an incremental cost-effectiveness ratio will be computed as the mean  
34  
35 cost difference between Predictive Parenting and the attention control condition divided by  
36  
37 the mean difference in change in measures of outcome respectively. If one treatment is  
38  
39 indicating it is likely to be both more effective and costlier than the other, we would consider  
40  
41 if there is some suggestion that it is worth incurring the higher costs in order to achieve the  
42  
43 improved outcomes. The approach we will employ to reveal the nature of trade-offs such as  
44  
45 these – and to represent the inherent uncertainty in any evaluation – will be to plot cost-  
46  
47 effectiveness acceptability curves generated from bootstrap analyses. Sensitivity analyses will  
48  
49 explore the impact of key assumptions such as the costing of unpaid care time and lost  
50  
51 productivity, and the choice of outcome.  
52  
53  
54  
55

## 56 **ETHICS AND DISSEMINATION**

57  
58  
59  
60



1  
2  
3 Ethical approval was granted from NHS Camden and Kings Cross Research Ethics  
4  
5 Committee on 18/11/2016 (ref: 16/LO/1769). Written consent is obtained from all  
6  
7 participating parents. Assent from children is obtained where appropriate. The SPIRIT  
8  
9 reporting guidelines are followed for this protocol.(41)  
10  
11

12 For the pilot RCT, we formed a TSC which includes an independent chair,  
13  
14 independent members and parent representatives (see below for membership). The TSC met  
15  
16 prior to the commencement of the pilot RCT to agree the study protocol and will meet at least  
17  
18 annually thereafter. The TSC were consulted on the study protocol, techniques for  
19  
20 ascertainment and the focus of measurement including the primary outcome. They were also  
21  
22 consulted on whether a DMC is required and decided that a sub-committee of the TSC  
23  
24 (consisting of the chair and statistician) could act as the DMC.  
25  
26  
27

28 Adverse events are measured at post-intervention and include events related to child,  
29  
30 parent and family wellbeing that may not be captured by outcome measures (e.g., increased  
31  
32 family discord, school refusal, significant change in a sibling's wellbeing or behaviour) as  
33  
34 well as pre-defined standard medical events. Such events that arise during treatment are  
35  
36 documented when a situation becomes known to group facilitators. The TSC and DMC have  
37  
38 independent oversight of the study and are informed of all adverse events.  
39  
40  
41  
42

43 This trial will contribute to the literature on parenting interventions for reducing  
44  
45 emotional and behavioural difficulties displayed by young autistic children. As the study is a  
46  
47 pilot RCT, conclusions about the efficacy of the intervention are not possible. However, the  
48  
49 study design enables us to consider the feasibility of conducting a large-scale RCT to test the  
50  
51 efficacy of Predictive Parenting. The findings from the pilot RCT will be disseminated  
52  
53 through publication in peer-reviewed journals of general and special interest and  
54  
55 presentations at national and international conferences. There will also be a general  
56  
57  
58  
59  
60

1  
2  
3 dissemination programme for families including participants co-ordinated through our  
4  
5 collaborators in the National Autistic Society.  
6  
7  
8  
9  
10  
11  
12  
13  
14  
15  
16  
17  
18  
19  
20  
21  
22  
23  
24  
25  
26  
27  
28  
29  
30  
31  
32  
33  
34  
35  
36  
37  
38  
39  
40  
41  
42  
43  
44  
45  
46  
47  
48  
49  
50  
51  
52  
53  
54  
55  
56  
57  
58  
59  
60

For peer review only

## TRIAL STATUS

Protocol version 1.4, dated 04/02/2019, see our ISRCTN record for log of protocol amendments. Recruitment was completed on the 16/10/2018. Post-intervention assessments are due for completion by 30/04/2019.

## TRIAL SPONSOR

King's College London and South London and Maudsley NHS Foundation Trust. Email: slam-ioppn.research@kcl.ac.uk.

## TRIAL STEERING COMMITTEE

Professor Alan Stein, University of Oxford (Chair); Dr Matt Sydes, MRC Clinical Trials Unit, University College London (Member); Dr Jacqueline Rodgers, University of Newcastle (Member); Bridget Gilchrist (Parent Representative); Lindsay Stairs (Parent Representative).

## DATA MONITORING COMMITTEE

As the trial is a pilot RCT, the TSC agreed that a subgroup consisting of Professor Alan Stein and Dr Matt Sydes would act as the DMC for ASTAR.

## ACKNOWLEDGEMENTS

We are grateful to the families who were involved in the initial feasibility study and to those who are involved in the pilot trial. We would like to thank other members of the IAMHealth consortium for their comments and advice on the trial design. We would also like to thank local professionals who assisted with identifying potential participants, with particular thanks to Dr Shade Alu, Sarran Bond, Marion Drennan, Dr Mark O'Leary, Dr Fernando Salazar and Jackie Sutherland. We would also like to acknowledge Katherine Appleby, Elena Baker,

1  
2  
3 Emma Biggin, Sophie Carruthers, Margot Frayne, Lydia Johnson-Ferguson, Moriya  
4  
5 Maccabee and Sophie Webb for their assistance with data collection.  
6  
7  
8  
9

## 10 **AUTHORS' CONTRIBUTIONS**

11  
12 MP, JT, JPP, RR, DS, BB, MK, VS, AP, ES, SS and TC were involved in designing the study  
13  
14 and drafting the protocol for the pilot RCT. TCa is involved in recruiting and collecting data  
15  
16 for the pilot RCT. VH, JM, LB and MH are involved in developing and delivering the  
17  
18 interventions. The manuscript was drafted by MP and all authors read, made revisions and  
19  
20 approved the final version.  
21  
22  
23  
24  
25

## 26 **FUNDING STATEMENT**

27  
28 This trial summarises independent research funded by the National Institute for Health  
29  
30 Research (NIHR) under its Programme Grants for Applied Research programme (RP-PG-  
31  
32 1211-20016). The views expressed in this presentation are those of the authors and not  
33  
34 necessarily those of the NHS, the NIHR or the Department of Health. Additional funding for  
35  
36 intervention materials was received from the Maudsley Charity (1157). MK receives support  
37  
38 from the NIHR School for Social Care Research. AP receives support from the NIHR  
39  
40 through a Senior Investigator Award (NF-SI-0617-10120). ES additionally receives support  
41  
42 from the National Institute for Health Research (NIHR) Biomedical Research Centre at South  
43  
44 London and Maudsley Foundation Trust (IS-BRC-1215-20018), the NIHR through a Senior  
45  
46 Investigator Award (NF-SI-0514-10073), the European Union Innovative Medicines  
47  
48 Initiative (EU-IMI 115300), Autistica (7237), Medical Research Council (MR/R000832/1,  
49  
50 MR/P019293/1), the Economic and Social Research Council (ESRC 003041/1), Guy's and St  
51  
52 Thomas' Charitable Foundation (GSTT EF1150502) and the Maudsley Charity. TC receives  
53  
54  
55  
56  
57  
58  
59  
60

1  
2  
3 grant or research support from the NIHR, the Medical Research Council, the European Union  
4  
5 (IMI, H2020), Autistica, MQ and The Waterloo Foundation.  
6  
7  
8  
9

### 10 **COMPETING INTERESTS**

11  
12 AP declares that he receives royalties from WPS for the Social Communication  
13  
14 Questionnaire.  
15  
16

### 17 **PATIENT CONSENT**

18  
19  
20  
21 Obtained.  
22  
23

### 24 **ETHICAL APPROVAL**

25  
26  
27  
28 Obtained from NHS Camden and Kings Cross Research Ethics Committee (ref: 16/LO/1769).  
29  
30  
31

### 32 **PROVENANCE AND PEER REVIEW**

33  
34  
35 Not commissioned; externally peer reviewed for funding and subsequently ethical approval  
36  
37 prior to submission.  
38  
39  
40  
41  
42  
43  
44  
45  
46  
47  
48  
49  
50  
51  
52  
53  
54  
55  
56  
57  
58  
59  
60

## REFERENCES

- 1  
2  
3  
4  
5  
6  
7 (1) American Psychiatric Association. Diagnostic and Statistical Manual of Mental  
8 Disorders: DSM-5 (5th ed.). Arlington, VA: American Psychiatric Association 2013.  
9
- 10 (2) Baird G, Simonoff E, Pickles A, et al. Prevalence of disorders of the autism spectrum in a  
11 population cohort of children in South Thames: the Special Needs and Autism Project  
12 (SNAP). *Lancet* 2006;368:210–215.  
13
- 14 (3) Baio J, Wiggins L, Christensen DL, et al. Prevalence of autism spectrum disorder among  
15 children aged 8 years - Autism and Developmental Disabilities Monitoring Network, 11  
16 Sites, United States, 2014. *MMWR Surveill* 2018;67:1–23.  
17
- 18 (4) Russell G, Rodgers LR, Ukoumunne OC, et al. Prevalence of parent-reported ASD and  
19 ADHD in the UK: Findings from the Millennium Cohort Study. *J Autism Dev Disord*  
20 2014;44:31–40.  
21
- 22 (5) Loomes R, Hull L, Mandy WPL. What is the male-to-female ratio in autism spectrum  
23 disorder? A systematic review and meta-analysis. *J Am Acad Child Adolesc Psychiatry* 2017  
24 ;56:466–474.  
25
- 26 (6) Charman T, Pickles A, Simonoff E, et al. IQ in children with autism spectrum disorders:  
27 data from the Special Needs and Autism Project (SNAP). *Psychol Med* 2011;41:619–627.  
28
- 29 (7) Salazar F, Baird G, Chandler S, et al. Co-occurring psychiatric disorders in preschool and  
30 elementary school-aged children with autism spectrum disorder. *J Autism Dev Disord*  
31 2015;40:1080–1093.  
32
- 33 (8) Chandler S, Howlin P, Simonoff E, et al. Emotional and behavioural problems in young  
34 children with autism spectrum disorder. *Dev Med Child Neurol* 2016;58:202–208.  
35
- 36 (9) Simonoff E, Pickles A, Charman T, et al. Psychiatric disorders in children with autism  
37 spectrum disorders: Prevalence, comorbidity, and associated factors in a population-derived  
38 sample. *J Am Acad Child Adolesc Psychiatry* 2008;47:921–929.  
39
- 40 (10) Simonoff E, Jones C R, Baird G, et al. The persistence and stability of psychiatric  
41 problems in adolescents with autism spectrum disorders. *J Child Psychol Psychiatry*  
42 2013;54:186–194.  
43
- 44 (11) Yorke I, White P, Weston A, et al. The association between emotional and behavioral  
45 problems in children with autism spectrum disorder and psychological distress in their  
46 parents: A systematic review and meta-analysis. *J Autism Dev Disord* 2018;48:3393–3415.  
47
- 48 (12) National Institute for Health and Clinical Excellence. Antisocial behaviour and conduct  
49 disorders in children and young people: Recognition and management (CG158). 2013.  
50 <https://www.nice.org.uk/guidance/cg158>  
51  
52  
53  
54  
55  
56  
57  
58  
59  
60

- 1  
2  
3 (13) Postorino V, Sharp WG, McCracken CE, et al. A systematic review and meta-analysis of  
4 parent training for disruptive behavior in children with autism spectrum disorder. *Clin Child*  
5 *Fam Psychol Rev* 2017;20:391–402.  
6  
7  
8 (14) Ozsivadjian A, Knott FF, Magiati I. Parent and child perspectives on the nature of  
9 anxiety in children and young people with autism spectrum disorders: A focus group study.  
10 *Autism* 2012;16:107–121.  
11  
12 (15) Bearss K, Taylor CA, Aman MG, et al. Using qualitative methods to guide scale  
13 development for anxiety in youth with autism spectrum disorder. *Autism* 2015;20:663–672.  
14  
15  
16 (16) Ung D, Selles R, Small BJ, et al. A systematic review and meta-analysis of cognitive-  
17 behavioral therapy for anxiety in youth with high-functioning autism spectrum disorders.  
18 *Child Psychiatry Hum Dev* 2015;46:533–547.  
19  
20 (17) Sonuga-Barke EJ, Brandeis D, Cortese S, et al. Nonpharmacological interventions for  
21 ADHD: Systematic review and meta-analyses of randomized controlled trials of dietary and  
22 psychological treatments. *Am J Psychiatry* 2013;170:275–289.  
23  
24 (18) Craig P, Dieppe P, Macintyre S, et al. Developing and evaluating complex interventions:  
25 The new Medical Research Council guidance. *BMJ* 2008;337:a1655.  
26  
27 (19) Sofronoff K, Attwood T, Hinton S. A randomised controlled trial of a CBT intervention  
28 for anxiety in children with asperger syndrome. *J Child Psychol Psychiatry* 2005;46:1152–  
29 1160.  
30  
31 (20) Wakschlag LS, Hill C, Carter AS, et al. Observational assessment of preschool  
32 disruptive behavior, part I: Reliability of the Disruptive Behavior Diagnostic Observation  
33 Schedule (DB-DOS). *J Am Acad Child Adolesc Psychiatry* 2008;47:622–631.  
34  
35 (21) Robinson EA, Eyberg SM. The dyadic parent-child interaction coding system:  
36 Standardization and validation. *J Consult Clin Psychol* 1981;49:245–250.  
37  
38 (22) Johnson CR, Butter EM, Handen BL et al. Standardised Observation Analogue  
39 Procedure (SOAP) for assessing parent and child behaviours in clinical trials. *J Intellect Dev*  
40 *Disabil* 2009;34:230–238.  
41  
42 (23) Mian ND, Carter AS, Pine DS, et al. Development of a novel observational measure for  
43 anxiety in young children: The Anxiety Dimensional Observation Scale. *J Child Psychol*  
44 *Psychiatry* 2015;56:1017–1025.  
45  
46 (24) Aman MG, Singh NN, Stewart AW, et al. The Aberrant Behavior Checklist: A behavior  
47 rating scale for the assessment of treatment effects. *Am J Ment Defic* 1985;89:485–491.  
48  
49 (25) Santosh P, Tarver J, Gibbons F, et al. Protocol for the development and validation of a  
50 questionnaire to assess concerning behaviours and mental health in individuals with autism  
51 spectrum disorders: The Assessment of Concerning Behaviour (ACB) scale. *BMJ Open*  
52 2016;6:e010693.  
53  
54  
55  
56  
57  
58  
59  
60

- 1  
2  
3 (26) Chowdhury M, Aman MG, Lecavalier L, et al. Factor structure and psychometric  
4 properties of the revised Home Situations Questionnaire for autism spectrum disorder: The  
5 Home Situations Questionnaire-Autism Spectrum Disorder. *Autism* 2015;54:281–291.  
6  
7  
8 (27) Edwards SL, Rapee RM, Kennedy SJ, et al. The assessment of anxiety symptoms in  
9 preschool-aged children: The revised Preschool Anxiety Scale. *J Clin Child Adolesc Psychol*  
10 2010;39:400–409.  
11  
12 (28) Arnold LE, Vitiello B, McDougle C, et al. Parent-defined target symptoms respond to  
13 risperidone in RUPP autism study: Customer approach to clinical trials. *J Am Acad Child*  
14 *Adolesc Psychiatry* 2003;42:1443-1450.  
15  
16 (29) Guy W. ECDEU Assessment Manual for Psychopharmacology: Publication ADM 76-  
17 338. 1976.  
18  
19 (30) Silva LM, Schalock M. Autism Parenting Stress Index: Initial psychometric evidence. *J*  
20 *Autism Dev Disord* 2012;42:566–574.  
21  
22 (31) Emser TS, Mazzucchelli TG, Christiansen H, et al. Child Adjustment and Parent  
23 Efficacy Scale-Developmental Disability (CAPES-DD): First psychometric evaluation of a  
24 new child and parenting assessment tool for children with a developmental disability. *Res*  
25 *Dev Disabil* 2016;53-54:158–177.  
26  
27 (32) NHS Health Scotland, University of Warwick and University of Edinburgh. Short  
28 Warwick Edinburgh Mental Well-Being Scale (SWEMWBS). 2008.  
29 <https://warwick.ac.uk/fac/sci/med/research/platform/wemwbs/development/swemwbs/>  
30  
31 (33) Arnold DS, O'Leary SG, Wolff LS, et al. The Parenting Scale: A measure of  
32 dysfunctional parenting in discipline situations. *Psychol Assess* 1993;5:137–144.  
33  
34 (34) Rutter M, Bailey A, Lord C. Social Communication Questionnaire. Los Angeles, CA:  
35 Western Psychological Services 2003.  
36  
37 (35) Lord C, Rutter M, DiLavore PC, et al. Autism Diagnostic Observation Schedule (2nd  
38 ed.). Torrance, CA: Western Psychological Services 2012.  
39  
40 (36) Harrison P, Oakland T. Adaptive Behavior Assessment System (ABAS-3) (3rd ed.) Los  
41 Angeles, CA: Western Psychological Services 2015.  
42  
43 (37) Office of National Statistics. Measuring national well-being: Personal wellbeing in the  
44 UK, 2014 to 2015 (Statistical Bulletin). 2015.  
45 <https://www.ons.gov.uk/peoplepopulationandcommunity/wellbeing/bulletins/measuringnationalwellbeing/2015-09-23>  
46  
47 (38) EuroQol Group. EuroQol--A new facility for the measurement of health-related quality  
48 of life. *Health Policy* 1990;16:199–208.  
49  
50 (39) Beecham J, Knapp M. Costing psychiatric interventions. In: Thornicroft G, ed.  
51 Measuring Mental Health Needs (2nd ed). London: Royal College of Psychiatrists 2001:200–  
52 224.  
53  
54  
55  
56  
57  
58  
59  
60



1  
2  
3 (40) Curtis L, Burns A. Unit costs of health and social care 2017. Personal Social Service  
4 Research Unit, University of Kent, Canterbury 2017. [https://www.pssru.ac.uk/project-](https://www.pssru.ac.uk/project-pages/unit-costs/unit-costs-2017/)  
5 [pages/unit-costs/unit-costs-2017/](https://www.pssru.ac.uk/project-pages/unit-costs/unit-costs-2017/)  
6  
7

8 (41) Chan AW, Tetzlaff JM, Altman DG, et al. SPIRIT 2013 Statement: Defining standard  
9 protocol items for clinical trials. *Rev Panam Salud Publica* 2015;38:506–514.  
10  
11  
12  
13  
14  
15  
16  
17  
18  
19  
20  
21  
22  
23  
24  
25  
26  
27  
28  
29  
30  
31  
32  
33  
34  
35  
36  
37  
38  
39  
40  
41  
42  
43  
44  
45  
46  
47  
48  
49  
50  
51  
52  
53  
54  
55  
56  
57  
58  
59  
60

For peer review only

# Reporting checklist for protocol of a clinical trial.

Based on the SPIRIT guidelines.

## Instructions to authors

Complete this checklist by entering the page numbers from your manuscript where readers will find each of the items listed below.

Your article may not currently address all the items on the checklist. Please modify your text to include the missing information. If you are certain that an item does not apply, please write "n/a" and provide a short explanation.

Upload your completed checklist as an extra file when you submit to a journal.

In your methods section, say that you used the SPIRIT reporting guidelines, and cite them as:

Chan A-W, Tetzlaff JM, Altman DG, Laupacis A, Gøtzsche PC, Krleža-Jerić K, Hróbjartsson A, Mann H, Dickersin K, Berlin J, Doré C, Parulekar W, Summerskill W, Groves T, Schulz K, Sox H, Rockhold FW, Rennie D, Moher D. SPIRIT 2013 Statement: Defining standard protocol items for clinical trials. *Ann Intern Med.* 2013;158(3):200-207

|                    |                     |                                                                                                              | Page   |
|--------------------|---------------------|--------------------------------------------------------------------------------------------------------------|--------|
|                    |                     | Reporting Item                                                                                               | Number |
| Title              | <a href="#">#1</a>  | Descriptive title identifying the study design, population, interventions, and, if applicable, trial acronym | 1      |
| Trial registration | <a href="#">#2a</a> | Trial identifier and registry name. If not yet registered, name of intended registry                         | 4      |

|    |                     |                     |                                                          |            |
|----|---------------------|---------------------|----------------------------------------------------------|------------|
| 1  | Trial registration: | <a href="#">#2b</a> | All items from the World Health Organization Trial       | 1-26       |
| 2  |                     |                     |                                                          |            |
| 3  | data set            |                     | Registration Data Set                                    |            |
| 4  |                     |                     |                                                          |            |
| 5  |                     |                     |                                                          |            |
| 6  | Protocol version    | <a href="#">#3</a>  | Date and version identifier                              | 24         |
| 7  |                     |                     |                                                          |            |
| 8  |                     |                     |                                                          |            |
| 9  | Funding             | <a href="#">#4</a>  | Sources and types of financial, material, and other      | 25-26      |
| 10 |                     |                     | support                                                  |            |
| 11 |                     |                     |                                                          |            |
| 12 |                     |                     |                                                          |            |
| 13 |                     |                     |                                                          |            |
| 14 |                     |                     |                                                          |            |
| 15 | Roles and           | <a href="#">#5a</a> | Names, affiliations, and roles of protocol contributors  | 25         |
| 16 | responsibilities:   |                     |                                                          |            |
| 17 |                     |                     |                                                          |            |
| 18 | contributorship     |                     |                                                          |            |
| 19 |                     |                     |                                                          |            |
| 20 |                     |                     |                                                          |            |
| 21 |                     |                     |                                                          |            |
| 22 | Roles and           | <a href="#">#5b</a> | Name and contact information for the trial sponsor       | 24         |
| 23 | responsibilities:   |                     |                                                          |            |
| 24 |                     |                     |                                                          |            |
| 25 | sponsor contact     |                     |                                                          |            |
| 26 |                     |                     |                                                          |            |
| 27 | information         |                     |                                                          |            |
| 28 |                     |                     |                                                          |            |
| 29 |                     |                     |                                                          |            |
| 30 |                     |                     |                                                          |            |
| 31 |                     |                     |                                                          |            |
| 32 | Roles and           | <a href="#">#5c</a> | Role of study sponsor and funders, if any, in study      | 24-25      |
| 33 | responsibilities:   |                     | design; collection, management, analysis, and            |            |
| 34 |                     |                     | interpretation of data; writing of the report; and the   |            |
| 35 | sponsor and funder  |                     | decision to submit the report for publication, including |            |
| 36 |                     |                     | whether they will have ultimate authority over any of    |            |
| 37 |                     |                     | these activities                                         |            |
| 38 |                     |                     |                                                          |            |
| 39 |                     |                     |                                                          |            |
| 40 |                     |                     |                                                          |            |
| 41 |                     |                     |                                                          |            |
| 42 |                     |                     |                                                          |            |
| 43 |                     |                     |                                                          |            |
| 44 |                     |                     |                                                          |            |
| 45 |                     |                     |                                                          |            |
| 46 |                     |                     |                                                          |            |
| 47 | Roles and           | <a href="#">#5d</a> | Composition, roles, and responsibilities of the          | 19, 22, 24 |
| 48 | responsibilities:   |                     | coordinating centre, steering committee, endpoint        |            |
| 49 |                     |                     | adjudication committee, data management team, and        |            |
| 50 | committees          |                     | other individuals or groups overseeing the trial, if     |            |
| 51 |                     |                     | applicable (see Item 21a for data monitoring committee)  |            |
| 52 |                     |                     |                                                          |            |
| 53 |                     |                     |                                                          |            |
| 54 |                     |                     |                                                          |            |
| 55 |                     |                     |                                                          |            |
| 56 |                     |                     |                                                          |            |
| 57 |                     |                     |                                                          |            |
| 58 |                     |                     |                                                          |            |
| 59 |                     |                     |                                                          |            |
| 60 |                     |                     |                                                          |            |

|    |                      |                      |                                                          |           |
|----|----------------------|----------------------|----------------------------------------------------------|-----------|
| 1  | Background and       | <a href="#">#6a</a>  | Description of research question and justification for   | 5-7       |
| 2  |                      |                      |                                                          |           |
| 3  | rationale            |                      | undertaking the trial, including summary of relevant     |           |
| 4  |                      |                      |                                                          |           |
| 5  |                      |                      | studies (published and unpublished) examining benefits   |           |
| 6  |                      |                      |                                                          |           |
| 7  |                      |                      | and harms for each intervention                          |           |
| 8  |                      |                      |                                                          |           |
| 9  |                      |                      |                                                          |           |
| 10 |                      |                      |                                                          |           |
| 11 | Background and       | <a href="#">#6b</a>  | Explanation for choice of comparators                    | 5-6       |
| 12 |                      |                      |                                                          |           |
| 13 | rationale: choice of |                      |                                                          |           |
| 14 |                      |                      |                                                          |           |
| 15 | comparators          |                      |                                                          |           |
| 16 |                      |                      |                                                          |           |
| 17 |                      |                      |                                                          |           |
| 18 | Objectives           | <a href="#">#7</a>   | Specific objectives or hypotheses                        | 6-7       |
| 19 |                      |                      |                                                          |           |
| 20 |                      |                      |                                                          |           |
| 21 |                      |                      |                                                          |           |
| 22 | Trial design         | <a href="#">#8</a>   | Description of trial design including type of trial (eg, | 9         |
| 23 |                      |                      |                                                          |           |
| 24 |                      |                      | parallel group, crossover, factorial, single group),     |           |
| 25 |                      |                      |                                                          |           |
| 26 |                      |                      | allocation ratio, and framework (eg, superiority,        |           |
| 27 |                      |                      |                                                          |           |
| 28 |                      |                      | equivalence, non-inferiority, exploratory)               |           |
| 29 |                      |                      |                                                          |           |
| 30 |                      |                      |                                                          |           |
| 31 |                      |                      |                                                          |           |
| 32 | Study setting        | <a href="#">#9</a>   | Description of study settings (eg, community clinic,     | 11, 17-18 |
| 33 |                      |                      |                                                          |           |
| 34 |                      |                      | academic hospital) and list of countries where data will |           |
| 35 |                      |                      |                                                          |           |
| 36 |                      |                      | be collected. Reference to where list of study sites can |           |
| 37 |                      |                      |                                                          |           |
| 38 |                      |                      | be obtained                                              |           |
| 39 |                      |                      |                                                          |           |
| 40 |                      |                      |                                                          |           |
| 41 |                      |                      |                                                          |           |
| 42 | Eligibility criteria | <a href="#">#10</a>  | Inclusion and exclusion criteria for participants. If    | 9-10      |
| 43 |                      |                      |                                                          |           |
| 44 |                      |                      | applicable, eligibility criteria for study centres and   |           |
| 45 |                      |                      |                                                          |           |
| 46 |                      |                      | individuals who will perform the interventions (eg,      |           |
| 47 |                      |                      |                                                          |           |
| 48 |                      |                      | surgeons, psychotherapists)                              |           |
| 49 |                      |                      |                                                          |           |
| 50 |                      |                      |                                                          |           |
| 51 | Interventions:       | <a href="#">#11a</a> | Interventions for each group with sufficient detail to   | 10-12     |
| 52 |                      |                      |                                                          |           |
| 53 | description          |                      | allow replication, including how and when they will be   |           |
| 54 |                      |                      |                                                          |           |
| 55 |                      |                      | administered                                             |           |
| 56 |                      |                      |                                                          |           |
| 57 |                      |                      |                                                          |           |
| 58 |                      |                      |                                                          |           |
| 59 |                      |                      |                                                          |           |
| 60 |                      |                      |                                                          |           |

|    |                      |                      |                                                            |       |
|----|----------------------|----------------------|------------------------------------------------------------|-------|
| 1  | Interventions:       | <a href="#">#11b</a> | Criteria for discontinuing or modifying allocated          | N/A   |
| 2  |                      |                      |                                                            |       |
| 3  | modifications        |                      | interventions for a given trial participant (eg, drug dose |       |
| 4  |                      |                      | change in response to harms, participant request, or       |       |
| 5  |                      |                      | improving / worsening disease)                             |       |
| 6  |                      |                      |                                                            |       |
| 7  |                      |                      |                                                            |       |
| 8  |                      |                      |                                                            |       |
| 9  |                      |                      |                                                            |       |
| 10 |                      |                      |                                                            |       |
| 11 | Interventions:       | <a href="#">#11c</a> | Strategies to improve adherence to intervention            | 12    |
| 12 |                      |                      |                                                            |       |
| 13 | adherence            |                      | protocols, and any procedures for monitoring adherence     |       |
| 14 |                      |                      | (eg, drug tablet return; laboratory tests)                 |       |
| 15 |                      |                      |                                                            |       |
| 16 |                      |                      |                                                            |       |
| 17 |                      |                      |                                                            |       |
| 18 |                      |                      |                                                            |       |
| 19 | Interventions:       | <a href="#">#11d</a> | Relevant concomitant care and interventions that are       | N/A   |
| 20 |                      |                      | permitted or prohibited during the trial                   |       |
| 21 | concomitant care     |                      |                                                            |       |
| 22 |                      |                      |                                                            |       |
| 23 |                      |                      |                                                            |       |
| 24 | Outcomes             | <a href="#">#12</a>  | Primary, secondary, and other outcomes, including the      | 12-17 |
| 25 |                      |                      | specific measurement variable (eg, systolic blood          |       |
| 26 |                      |                      | pressure), analysis metric (eg, change from baseline,      |       |
| 27 |                      |                      | final value, time to event), method of aggregation (eg,    |       |
| 28 |                      |                      | median, proportion), and time point for each outcome.      |       |
| 29 |                      |                      | Explanation of the clinical relevance of chosen efficacy   |       |
| 30 |                      |                      | and harm outcomes is strongly recommended                  |       |
| 31 |                      |                      |                                                            |       |
| 32 |                      |                      |                                                            |       |
| 33 |                      |                      |                                                            |       |
| 34 |                      |                      |                                                            |       |
| 35 |                      |                      |                                                            |       |
| 36 |                      |                      |                                                            |       |
| 37 |                      |                      |                                                            |       |
| 38 |                      |                      |                                                            |       |
| 39 |                      |                      |                                                            |       |
| 40 |                      |                      |                                                            |       |
| 41 | Participant timeline | <a href="#">#13</a>  | Time schedule of enrolment, interventions (including any   | 17-18 |
| 42 |                      |                      | run-ins and washouts), assessments, and visits for         |       |
| 43 |                      |                      | participants. A schematic diagram is highly                |       |
| 44 |                      |                      | recommended (see Figure)                                   |       |
| 45 |                      |                      |                                                            |       |
| 46 |                      |                      |                                                            |       |
| 47 |                      |                      |                                                            |       |
| 48 |                      |                      |                                                            |       |
| 49 |                      |                      |                                                            |       |
| 50 |                      |                      |                                                            |       |
| 51 | Sample size          | <a href="#">#14</a>  | Estimated number of participants needed to achieve         | 12    |
| 52 |                      |                      | study objectives and how it was determined, including      |       |
| 53 |                      |                      | clinical and statistical assumptions supporting any        |       |
| 54 |                      |                      | sample size calculations                                   |       |
| 55 |                      |                      |                                                            |       |
| 56 |                      |                      |                                                            |       |
| 57 |                      |                      |                                                            |       |
| 58 |                      |                      |                                                            |       |
| 59 |                      |                      |                                                            |       |
| 60 |                      |                      |                                                            |       |

|    |                      |                      |                                                           |       |
|----|----------------------|----------------------|-----------------------------------------------------------|-------|
| 1  | Recruitment          | <a href="#">#15</a>  | Strategies for achieving adequate participant enrolment   | 17-18 |
| 2  |                      |                      | to reach target sample size                               |       |
| 3  |                      |                      |                                                           |       |
| 4  |                      |                      |                                                           |       |
| 5  |                      |                      |                                                           |       |
| 6  | Allocation: sequence | <a href="#">#16a</a> | Method of generating the allocation sequence (eg,         | 9     |
| 7  | generation           |                      | computer-generated random numbers), and list of any       |       |
| 8  |                      |                      | factors for stratification. To reduce predictability of a |       |
| 9  |                      |                      | random sequence, details of any planned restriction (eg,  |       |
| 10 |                      |                      | blocking) should be provided in a separate document       |       |
| 11 |                      |                      | that is unavailable to those who enrol participants or    |       |
| 12 |                      |                      | assign interventions                                      |       |
| 13 |                      |                      |                                                           |       |
| 14 |                      |                      |                                                           |       |
| 15 |                      |                      |                                                           |       |
| 16 |                      |                      |                                                           |       |
| 17 |                      |                      |                                                           |       |
| 18 |                      |                      |                                                           |       |
| 19 |                      |                      |                                                           |       |
| 20 |                      |                      |                                                           |       |
| 21 |                      |                      |                                                           |       |
| 22 |                      |                      |                                                           |       |
| 23 | Allocation           | <a href="#">#16b</a> | Mechanism of implementing the allocation sequence         | 9, 18 |
| 24 | concealment          |                      | (eg, central telephone; sequentially numbered, opaque,    |       |
| 25 |                      |                      | sealed envelopes), describing any steps to conceal the    |       |
| 26 | mechanism            |                      | sequence until interventions are assigned                 |       |
| 27 |                      |                      |                                                           |       |
| 28 |                      |                      |                                                           |       |
| 29 |                      |                      |                                                           |       |
| 30 |                      |                      |                                                           |       |
| 31 |                      |                      |                                                           |       |
| 32 |                      |                      |                                                           |       |
| 33 | Allocation:          | <a href="#">#16c</a> | Who will generate the allocation sequence, who will       | 9, 18 |
| 34 | implementation       |                      | enrol participants, and who will assign participants to   |       |
| 35 |                      |                      | interventions                                             |       |
| 36 |                      |                      |                                                           |       |
| 37 |                      |                      |                                                           |       |
| 38 |                      |                      |                                                           |       |
| 39 |                      |                      |                                                           |       |
| 40 |                      |                      |                                                           |       |
| 41 | Blinding (masking)   | <a href="#">#17a</a> | Who will be blinded after assignment to interventions     | 9, 18 |
| 42 |                      |                      | (eg, trial participants, care providers, outcome          |       |
| 43 |                      |                      | assessors, data analysts), and how                        |       |
| 44 |                      |                      |                                                           |       |
| 45 |                      |                      |                                                           |       |
| 46 |                      |                      |                                                           |       |
| 47 |                      |                      |                                                           |       |
| 48 | Blinding (masking):  | <a href="#">#17b</a> | If blinded, circumstances under which unblinding is       | N/A   |
| 49 | emergency            |                      | permissible, and procedure for revealing a participant's  |       |
| 50 |                      |                      | allocated intervention during the trial                   |       |
| 51 | unblinding           |                      |                                                           |       |
| 52 |                      |                      |                                                           |       |
| 53 |                      |                      |                                                           |       |
| 54 |                      |                      |                                                           |       |
| 55 |                      |                      |                                                           |       |
| 56 |                      |                      |                                                           |       |
| 57 |                      |                      |                                                           |       |
| 58 |                      |                      |                                                           |       |
| 59 |                      |                      |                                                           |       |
| 60 |                      |                      |                                                           |       |

|    |                        |                      |                                                             |       |
|----|------------------------|----------------------|-------------------------------------------------------------|-------|
| 1  | Data collection plan   | <a href="#">#18a</a> | Plans for assessment and collection of outcome,             | 12-18 |
| 2  |                        |                      | baseline, and other trial data, including any related       |       |
| 3  |                        |                      | processes to promote data quality (eg, duplicate            |       |
| 4  |                        |                      | measurements, training of assessors) and a description      |       |
| 5  |                        |                      | of study instruments (eg, questionnaires, laboratory        |       |
| 6  |                        |                      | tests) along with their reliability and validity, if known. |       |
| 7  |                        |                      |                                                             |       |
| 8  |                        |                      | Reference to where data collection forms can be found,      |       |
| 9  |                        |                      | if not in the protocol                                      |       |
| 10 |                        |                      |                                                             |       |
| 11 | Data collection plan:  | <a href="#">#18b</a> | Plans to promote participant retention and complete         | 18    |
| 12 | retention              |                      | follow-up, including list of any outcome data to be         |       |
| 13 |                        |                      | collected for participants who discontinue or deviate       |       |
| 14 |                        |                      | from intervention protocols                                 |       |
| 15 |                        |                      |                                                             |       |
| 16 | Data management        | <a href="#">#19</a>  | Plans for data entry, coding, security, and storage,        | 18-19 |
| 17 |                        |                      | including any related processes to promote data quality     |       |
| 18 |                        |                      | (eg, double data entry; range checks for data values).      |       |
| 19 |                        |                      | Reference to where details of data management               |       |
| 20 |                        |                      | procedures can be found, if not in the protocol             |       |
| 21 |                        |                      |                                                             |       |
| 22 | Statistics: outcomes   | <a href="#">#20a</a> | Statistical methods for analysing primary and secondary     | 19-21 |
| 23 |                        |                      | outcomes. Reference to where other details of the           |       |
| 24 |                        |                      | statistical analysis plan can be found, if not in the       |       |
| 25 |                        |                      | protocol                                                    |       |
| 26 |                        |                      |                                                             |       |
| 27 | Statistics: additional | <a href="#">#20b</a> | Methods for any additional analyses (eg, subgroup and       | N/A   |
| 28 | analyses               |                      | adjusted analyses)                                          |       |
| 29 |                        |                      |                                                             |       |
| 30 |                        |                      |                                                             |       |
| 31 |                        |                      |                                                             |       |
| 32 |                        |                      |                                                             |       |
| 33 |                        |                      |                                                             |       |
| 34 |                        |                      |                                                             |       |
| 35 |                        |                      |                                                             |       |
| 36 |                        |                      |                                                             |       |
| 37 |                        |                      |                                                             |       |
| 38 |                        |                      |                                                             |       |
| 39 |                        |                      |                                                             |       |
| 40 |                        |                      |                                                             |       |
| 41 |                        |                      |                                                             |       |
| 42 |                        |                      |                                                             |       |
| 43 |                        |                      |                                                             |       |
| 44 |                        |                      |                                                             |       |
| 45 |                        |                      |                                                             |       |
| 46 |                        |                      |                                                             |       |
| 47 |                        |                      |                                                             |       |
| 48 |                        |                      |                                                             |       |
| 49 |                        |                      |                                                             |       |
| 50 |                        |                      |                                                             |       |
| 51 |                        |                      |                                                             |       |
| 52 |                        |                      |                                                             |       |
| 53 |                        |                      |                                                             |       |
| 54 |                        |                      |                                                             |       |
| 55 |                        |                      |                                                             |       |
| 56 |                        |                      |                                                             |       |
| 57 |                        |                      |                                                             |       |
| 58 |                        |                      |                                                             |       |
| 59 |                        |                      |                                                             |       |
| 60 |                        |                      |                                                             |       |

|    |                      |                      |                                                              |            |
|----|----------------------|----------------------|--------------------------------------------------------------|------------|
| 1  | Statistics: analysis | <a href="#">#20c</a> | Definition of analysis population relating to protocol non-  | 19-20      |
| 2  |                      |                      |                                                              |            |
| 3  | population and       |                      | adherence (eg, as randomised analysis), and any              |            |
| 4  |                      |                      |                                                              |            |
| 5  | missing data         |                      | statistical methods to handle missing data (eg, multiple     |            |
| 6  |                      |                      |                                                              |            |
| 7  |                      |                      | imputation)                                                  |            |
| 8  |                      |                      |                                                              |            |
| 9  |                      |                      |                                                              |            |
| 10 |                      |                      |                                                              |            |
| 11 | Data monitoring:     | <a href="#">#21a</a> | Composition of data monitoring committee (DMC);              | 19, 22, 24 |
| 12 |                      |                      |                                                              |            |
| 13 | formal committee     |                      | summary of its role and reporting structure; statement of    |            |
| 14 |                      |                      |                                                              |            |
| 15 |                      |                      | whether it is independent from the sponsor and               |            |
| 16 |                      |                      | competing interests; and reference to where further          |            |
| 17 |                      |                      | details about its charter can be found, if not in the        |            |
| 18 |                      |                      | protocol. Alternatively, an explanation of why a DMC is      |            |
| 19 |                      |                      | not needed                                                   |            |
| 20 |                      |                      |                                                              |            |
| 21 |                      |                      |                                                              |            |
| 22 |                      |                      |                                                              |            |
| 23 |                      |                      |                                                              |            |
| 24 |                      |                      |                                                              |            |
| 25 |                      |                      |                                                              |            |
| 26 |                      |                      |                                                              |            |
| 27 |                      |                      |                                                              |            |
| 28 | Data monitoring:     | <a href="#">#21b</a> | Description of any interim analyses and stopping             | N/A        |
| 29 |                      |                      |                                                              |            |
| 30 | interim analysis     |                      | guidelines, including who will have access to these          |            |
| 31 |                      |                      |                                                              |            |
| 32 |                      |                      | interim results and make the final decision to terminate     |            |
| 33 |                      |                      |                                                              |            |
| 34 |                      |                      | the trial                                                    |            |
| 35 |                      |                      |                                                              |            |
| 36 |                      |                      |                                                              |            |
| 37 |                      |                      |                                                              |            |
| 38 | Harms                | <a href="#">#22</a>  | Plans for collecting, assessing, reporting, and managing     | 22         |
| 39 |                      |                      |                                                              |            |
| 40 |                      |                      | solicited and spontaneously reported adverse events          |            |
| 41 |                      |                      |                                                              |            |
| 42 |                      |                      | and other unintended effects of trial interventions or trial |            |
| 43 |                      |                      |                                                              |            |
| 44 |                      |                      | conduct                                                      |            |
| 45 |                      |                      |                                                              |            |
| 46 |                      |                      |                                                              |            |
| 47 |                      |                      |                                                              |            |
| 48 | Auditing             | <a href="#">#23</a>  | Frequency and procedures for auditing trial conduct, if      | N/A        |
| 49 |                      |                      |                                                              |            |
| 50 |                      |                      | any, and whether the process will be independent from        |            |
| 51 |                      |                      |                                                              |            |
| 52 |                      |                      | investigators and the sponsor                                |            |
| 53 |                      |                      |                                                              |            |
| 54 |                      |                      |                                                              |            |
| 55 | Research ethics      | <a href="#">#24</a>  | Plans for seeking research ethics committee /                | 22         |
| 56 |                      |                      |                                                              |            |
| 57 | approval             |                      | institutional review board (REC / IRB) approval              |            |
| 58 |                      |                      |                                                              |            |
| 59 |                      |                      |                                                              |            |
| 60 |                      |                      |                                                              |            |



|    |                    |                      |                                                            |     |
|----|--------------------|----------------------|------------------------------------------------------------|-----|
| 1  | Protocol           | <a href="#">#25</a>  | Plans for communicating important protocol                 | 24  |
| 2  |                    |                      |                                                            |     |
| 3  | amendments         |                      | modifications (eg, changes to eligibility criteria,        |     |
| 4  |                    |                      | outcomes, analyses) to relevant parties (eg,               |     |
| 5  |                    |                      | investigators, REC / IRBs, trial participants, trial       |     |
| 6  |                    |                      | registries, journals, regulators)                          |     |
| 7  |                    |                      |                                                            |     |
| 8  |                    |                      |                                                            |     |
| 9  |                    |                      |                                                            |     |
| 10 |                    |                      |                                                            |     |
| 11 |                    |                      |                                                            |     |
| 12 |                    |                      |                                                            |     |
| 13 | Consent or assent  | <a href="#">#26a</a> | Who will obtain informed consent or assent from            | 22  |
| 14 |                    |                      | potential trial participants or authorised surrogates, and |     |
| 15 |                    |                      | how (see Item 32)                                          |     |
| 16 |                    |                      |                                                            |     |
| 17 |                    |                      |                                                            |     |
| 18 |                    |                      |                                                            |     |
| 19 |                    |                      |                                                            |     |
| 20 |                    |                      |                                                            |     |
| 21 | Consent or assent: | <a href="#">#26b</a> | Additional consent provisions for collection and use of    | N/A |
| 22 |                    |                      | participant data and biological specimens in ancillary     |     |
| 23 | ancillary studies  |                      | studies, if applicable                                     |     |
| 24 |                    |                      |                                                            |     |
| 25 |                    |                      |                                                            |     |
| 26 |                    |                      |                                                            |     |
| 27 |                    |                      |                                                            |     |
| 28 |                    |                      |                                                            |     |
| 29 | Confidentiality    | <a href="#">#27</a>  | How personal information about potential and enrolled      | 19  |
| 30 |                    |                      | participants will be collected, shared, and maintained in  |     |
| 31 |                    |                      | order to protect confidentiality before, during, and after |     |
| 32 |                    |                      | the trial                                                  |     |
| 33 |                    |                      |                                                            |     |
| 34 |                    |                      |                                                            |     |
| 35 |                    |                      |                                                            |     |
| 36 |                    |                      |                                                            |     |
| 37 |                    |                      |                                                            |     |
| 38 |                    |                      |                                                            |     |
| 39 | Declaration of     | <a href="#">#28</a>  | Financial and other competing interests for principal      | 26  |
| 40 |                    |                      | investigators for the overall trial and each study site    |     |
| 41 | interests          |                      |                                                            |     |
| 42 |                    |                      |                                                            |     |
| 43 |                    |                      |                                                            |     |
| 44 | Data access        | <a href="#">#29</a>  | Statement of who will have access to the final trial       | 19  |
| 45 |                    |                      | dataset, and disclosure of contractual agreements that     |     |
| 46 |                    |                      | limit such access for investigators                        |     |
| 47 |                    |                      |                                                            |     |
| 48 |                    |                      |                                                            |     |
| 49 |                    |                      |                                                            |     |
| 50 |                    |                      |                                                            |     |
| 51 |                    |                      |                                                            |     |
| 52 | Ancillary and post | <a href="#">#30</a>  | Provisions, if any, for ancillary and post-trial care, and | N/A |
| 53 |                    |                      | for compensation to those who suffer harm from trial       |     |
| 54 | trial care         |                      | participation                                              |     |
| 55 |                    |                      |                                                            |     |
| 56 |                    |                      |                                                            |     |
| 57 |                    |                      |                                                            |     |
| 58 |                    |                      |                                                            |     |
| 59 |                    |                      |                                                            |     |
| 60 |                    |                      |                                                            |     |

|    |                       |                      |                                                               |            |
|----|-----------------------|----------------------|---------------------------------------------------------------|------------|
| 1  | Dissemination         | <a href="#">#31a</a> | Plans for investigators and sponsor to communicate trial      | 22-23      |
| 2  |                       |                      |                                                               |            |
| 3  | policy: trial results |                      | results to participants, healthcare professionals, the        |            |
| 4  |                       |                      | public, and other relevant groups (eg, via publication,       |            |
| 5  |                       |                      | reporting in results databases, or other data sharing         |            |
| 6  |                       |                      | arrangements), including any publication restrictions         |            |
| 7  |                       |                      |                                                               |            |
| 8  |                       |                      |                                                               |            |
| 9  |                       |                      |                                                               |            |
| 10 |                       |                      |                                                               |            |
| 11 |                       |                      |                                                               |            |
| 12 |                       |                      |                                                               |            |
| 13 | Dissemination         | <a href="#">#31b</a> | Authorship eligibility guidelines and any intended use of     | N/A        |
| 14 |                       |                      |                                                               |            |
| 15 | policy: authorship    |                      | professional writers                                          |            |
| 16 |                       |                      |                                                               |            |
| 17 |                       |                      |                                                               |            |
| 18 |                       |                      |                                                               |            |
| 19 | Dissemination         | <a href="#">#31c</a> | Plans, if any, for granting public access to the full         | N/A        |
| 20 |                       |                      |                                                               |            |
| 21 | policy: reproducible  |                      | protocol, participant-level dataset, and statistical code     |            |
| 22 |                       |                      |                                                               |            |
| 23 | research              |                      |                                                               |            |
| 24 |                       |                      |                                                               |            |
| 25 |                       |                      |                                                               |            |
| 26 | Informed consent      | <a href="#">#32</a>  | Model consent form and other related documentation            | On         |
| 27 |                       |                      |                                                               |            |
| 28 | materials             |                      | given to participants and authorised surrogates               | request    |
| 29 |                       |                      |                                                               |            |
| 30 |                       |                      |                                                               |            |
| 31 |                       |                      |                                                               | from study |
| 32 |                       |                      |                                                               |            |
| 33 |                       |                      |                                                               | team       |
| 34 |                       |                      |                                                               |            |
| 35 |                       |                      |                                                               |            |
| 36 | Biological            | <a href="#">#33</a>  | Plans for collection, laboratory evaluation, and storage      | N/A        |
| 37 |                       |                      |                                                               |            |
| 38 | specimens             |                      | of biological specimens for genetic or molecular analysis     |            |
| 39 |                       |                      |                                                               |            |
| 40 |                       |                      |                                                               |            |
| 41 |                       |                      | in the current trial and for future use in ancillary studies, |            |
| 42 |                       |                      |                                                               |            |
| 43 |                       |                      | if applicable                                                 |            |
| 44 |                       |                      |                                                               |            |
| 45 |                       |                      |                                                               |            |

46 The SPIRIT checklist is distributed under the terms of the Creative Commons Attribution License CC-  
 47 BY-ND 3.0. This checklist can be completed online using <https://www.goodreports.org/>, a tool made  
 48 by the [EQUATOR Network](#) in collaboration with [Penelope.ai](#)  
 49  
 50  
 51  
 52  
 53  
 54  
 55  
 56  
 57  
 58  
 59  
 60

# BMJ Open

**A novel group parenting intervention to reduce emotional and behavioural difficulties in young autistic children: Protocol for the Autism Spectrum Treatment and Resilience (ASTAR) pilot randomised controlled trial.**

|                                 |                                                                                                                                                                                                                                                                                                                                                                                                                                                                                                                                                                                                                                                                                                                                                                                                                                                                                                                                                                                                                                                                                                                                                                                                                                                                                                                                                                                                                                                                                                                                                                                                                                                                                                                                                                                                                                                                                                                                                                                                                                                                                                                                                                             |
|---------------------------------|-----------------------------------------------------------------------------------------------------------------------------------------------------------------------------------------------------------------------------------------------------------------------------------------------------------------------------------------------------------------------------------------------------------------------------------------------------------------------------------------------------------------------------------------------------------------------------------------------------------------------------------------------------------------------------------------------------------------------------------------------------------------------------------------------------------------------------------------------------------------------------------------------------------------------------------------------------------------------------------------------------------------------------------------------------------------------------------------------------------------------------------------------------------------------------------------------------------------------------------------------------------------------------------------------------------------------------------------------------------------------------------------------------------------------------------------------------------------------------------------------------------------------------------------------------------------------------------------------------------------------------------------------------------------------------------------------------------------------------------------------------------------------------------------------------------------------------------------------------------------------------------------------------------------------------------------------------------------------------------------------------------------------------------------------------------------------------------------------------------------------------------------------------------------------------|
| Journal:                        | <i>BMJ Open</i>                                                                                                                                                                                                                                                                                                                                                                                                                                                                                                                                                                                                                                                                                                                                                                                                                                                                                                                                                                                                                                                                                                                                                                                                                                                                                                                                                                                                                                                                                                                                                                                                                                                                                                                                                                                                                                                                                                                                                                                                                                                                                                                                                             |
| Manuscript ID                   | bmjopen-2019-029959.R1                                                                                                                                                                                                                                                                                                                                                                                                                                                                                                                                                                                                                                                                                                                                                                                                                                                                                                                                                                                                                                                                                                                                                                                                                                                                                                                                                                                                                                                                                                                                                                                                                                                                                                                                                                                                                                                                                                                                                                                                                                                                                                                                                      |
| Article Type:                   | Protocol                                                                                                                                                                                                                                                                                                                                                                                                                                                                                                                                                                                                                                                                                                                                                                                                                                                                                                                                                                                                                                                                                                                                                                                                                                                                                                                                                                                                                                                                                                                                                                                                                                                                                                                                                                                                                                                                                                                                                                                                                                                                                                                                                                    |
| Date Submitted by the Author:   | 24-Apr-2019                                                                                                                                                                                                                                                                                                                                                                                                                                                                                                                                                                                                                                                                                                                                                                                                                                                                                                                                                                                                                                                                                                                                                                                                                                                                                                                                                                                                                                                                                                                                                                                                                                                                                                                                                                                                                                                                                                                                                                                                                                                                                                                                                                 |
| Complete List of Authors:       | <p>Palmer, Melanie; Institute of Psychiatry, Psychology &amp; Neuroscience, King's College London, Department of Child and Adolescent Psychiatry</p> <p>Tarver, Joanne; Aston University School of Life and Health Sciences, Department of Psychology</p> <p>Paris Perez, Juan; Institute of Psychiatry, Psychology &amp; Neuroscience, King's College London, Department of Child and Adolescent Psychiatry</p> <p>Cawthorne, Thomas; Institute of Psychiatry, Psychology &amp; Neuroscience, King's College London, Department of Child and Adolescent Psychiatry</p> <p>Romeo, Renee; Institute of Psychiatry, Psychology &amp; Neuroscience, King's College London, Department of Health Service and Population Research</p> <p>Stringer, Dominic; Institute of Psychiatry, Psychology &amp; Neuroscience, King's College London, Department of Biostatistics and Health Informatics</p> <p>Hallett, Victoria; South London and Maudsley NHS Foundation Trust</p> <p>Mueller, Joanne; South London and Maudsley NHS Foundation Trust</p> <p>Breese, Lauren; South London and Maudsley NHS Foundation Trust</p> <p>Hollett, Megan; South London and Maudsley NHS Foundation Trust</p> <p>Beresford, Bryony; University of York, Social Policy Research Unit</p> <p>Knapp, Martin; London School of Economics, Personal Social Services Research Unit</p> <p>Slonims, Vicky; Guy's and St Thomas' NHS Foundation Trust, Evelina Children's Hospital</p> <p>Pickles, Andrew; Institute of Psychiatry, Psychology &amp; Neuroscience, King's College London, Department of Biostatistics and Health Informatics</p> <p>Simonoff, Emily; Institute of Psychiatry, Psychology &amp; Neuroscience, King's College London, Department of Child and Adolescent Psychiatry; South London and Maudsley NHS Foundation Trust</p> <p>Scott, Stephen; Institute of Psychiatry, Psychology &amp; Neuroscience, King's College London, Department of Child and Adolescent Psychiatry; South London and Maudsley NHS Foundation Trust</p> <p>Charman, Tony; King's College London, Institute of Psychiatry, Department of Psychology; South London and Maudsley NHS Foundation Trust</p> |
| <b>Primary Subject Heading</b>: | Mental health                                                                                                                                                                                                                                                                                                                                                                                                                                                                                                                                                                                                                                                                                                                                                                                                                                                                                                                                                                                                                                                                                                                                                                                                                                                                                                                                                                                                                                                                                                                                                                                                                                                                                                                                                                                                                                                                                                                                                                                                                                                                                                                                                               |

1  
2  
3  
4  
5  
6  
7  
8  
9  
10  
11  
12  
13  
14  
15  
16  
17  
18  
19  
20  
21  
22  
23  
24  
25  
26  
27  
28  
29  
30  
31  
32  
33  
34  
35  
36  
37  
38  
39  
40  
41  
42  
43  
44  
45  
46  
47  
48  
49  
50  
51  
52  
53  
54  
55  
56  
57  
58  
59  
60

|                            |                                                                                                |
|----------------------------|------------------------------------------------------------------------------------------------|
| Secondary Subject Heading: | Evidence based practice, Health economics                                                      |
| Keywords:                  | Autism, Emotional and Behavioural Difficulties, Parenting Intervention, Feasibility, Pilot RCT |
|                            |                                                                                                |

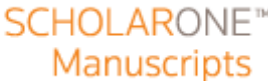

1  
2  
3 **TITLE:** A novel group parenting intervention to reduce emotional and behavioural  
4  
5 difficulties in young autistic children: Protocol for the Autism Spectrum Treatment and  
6  
7 Resilience (ASTAR) pilot randomised controlled trial.  
8  
9

10  
11  
12 **AUTHORS:**  
13

14 Melanie Palmer<sup>1</sup>, Joanne Tarver<sup>2,3</sup>, Juan Paris Perez<sup>1</sup>, Thomas Cawthorne<sup>1</sup>, Renee Romeo<sup>1</sup>,  
15  
16 Dominic Stringer<sup>1</sup>, Victoria Hallett<sup>4</sup>, Joanne Mueller<sup>4</sup>, Lauren Breese<sup>4</sup>, Megan Hollett<sup>4</sup>,  
17  
18 Bryony Beresford<sup>5</sup>, Martin Knapp<sup>6</sup>, Vicky Slonims<sup>7</sup>, Andrew Pickles<sup>1</sup>, Emily Simonoff<sup>1,4</sup>,  
19  
20 Stephen Scott<sup>1,4</sup> and Tony Charman<sup>1,4</sup>.  
21  
22  
23

24  
25  
26 **AUTHOR AFFILIATIONS:**  
27

28 <sup>1</sup>King's College London, Institute of Psychiatry, Psychology & Neuroscience, London, UK.  
29

30 <sup>2</sup>Department of Psychology, School of Life and Health Sciences, Aston University,  
31  
32 Birmingham, UK  
33

34 <sup>3</sup>Cerebra Centre for Neurodevelopmental Disorders, School of Psychology, University of  
35  
36 Birmingham, Birmingham, UK  
37

38 <sup>4</sup>South London and Maudsley NHS Foundation Trust, London, UK  
39

40 <sup>5</sup>Social Policy Research Unit, University of York, York, UK  
41

42 <sup>6</sup>Department of Health Policy, London School of Economics and Political Science, London,  
43  
44 UK  
45  
46

47 <sup>7</sup>Newcomen Neurodevelopmental Centre, Children's Neurosciences, Evelina Children's  
48  
49 Hospital, Guy's and St Thomas NHS Foundation Trust, London, UK.  
50  
51  
52  
53  
54  
55  
56  
57  
58  
59  
60

**CORRESPONDING AUTHOR:**

The corresponding author, Melanie Palmer, can be contacted via email at

[melanie.palmer@kcl.ac.uk](mailto:melanie.palmer@kcl.ac.uk), or by telephone on +44 (0) 207 848 5260.

**ORCID NUMBERS:**

|                  |                     |
|------------------|---------------------|
| Melanie Palmer   | 0000-0001-5579-2170 |
| Joanne Tarver    | 0000-0003-0555-6043 |
| Juan Paris Perez | 0000-0003-3171-0315 |
| Thomas Cawthorne | 0000-0003-4537-0016 |
| Renee Romeo      | 0000-0003-3871-9697 |
| Dominic Stringer | 0000-0001-5624-1733 |
| Victoria Hallett | 0000-0002-7432-9824 |
| Joanne Mueller   | 0000-0003-2737-1883 |
| Lauren Breese    | 0000-0002-1246-7703 |
| Megan Hollett    | 0000-0003-3123-1867 |
| Bryony Beresford | 0000-0003-0716-2902 |
| Martin Knapp     | 0000-0003-1427-0215 |
| Vicky Slonims    | 0000-0003-3339-2365 |
| Andrew Pickles   | 0000-0003-1283-0346 |
| Emily Simonoff   | 0000-0002-5450-0823 |
| Stephen Scott    | 0000-0003-4680-6213 |
| Tony Charman     | 0000-0003-1993-6549 |

## ABSTRACT

**Introduction:** The majority of young autistic children display impairing emotional and behavioural difficulties that contribute to family stress. There is some evidence that behavioural parenting interventions are effective for reducing behavioural difficulties in autistic children, with less evidence assessing change in emotional difficulties. Previous trials have tended to use unblinded parent-report measures as primary outcomes and many do not employ an active control, limiting the conclusions that can be drawn.

**Methods and analysis:** The Autism Spectrum Treatment and Resilience (ASTAR) study is a pilot randomised controlled trial (RCT) testing the specific effect of a 12-week group parenting intervention (Predictive Parenting) on primary and secondary outcomes, in comparison to an attention control condition consisting of psychoeducation parent groups. Following a feasibility study to test research procedures and the interventions, the pilot RCT participants include 60 parents of 4-8 year old autistic children who are randomised to Predictive Parenting versus the attention control. Measures are administered at baseline and post-intervention to assess group differences in the child and parent outcomes, costs and service use, and adverse events. The primary outcome is an objective measure of child behaviour that challenges during interactions with their parent and a researcher. The trial aims to provide data on recruitment, retention, completion of measures and acceptability of the intervention and research protocol, in addition to providing a preliminary indication of potential efficacy and establishing an effect size that could be used to power a larger-scale efficacy trial. We will also provide preliminary estimates of the cost-effectiveness of the interventions.

**Ethics and dissemination:** Ethical approval was granted from NHS Camden and Kings Cross Research Ethics Committee (ref: 16/LO/1769) along with NHS R&D approval from South London and Maudsley, Guy's and St Thomas', and Croydon Health Services NHS

1  
2  
3 Trusts. The findings will be disseminated through publication in peer-reviewed journals and  
4  
5 presentations at conferences.  
6

7  
8 **Trial registration number:** ISRCTN91411078.  
9

10  
11  
12 **Strengths and limitations of the study:**  
13

- 14
- 15 • The trial uses an objective measure as the primary outcome overcoming biases  
16 associated with participants being unblinded to treatment status.  
17
  - 18 • The target intervention, developed by clinicians with expertise in autism, is compared  
19 to an attention control condition to further guard against placebo effects.  
20
  - 21 • A feasibility study with nested qualitative evaluation enabled refinement of the  
22 intervention and research procedures prior to commencing the pilot RCT.  
23
  - 24 • Parents and autistic adults, referred to as patient and public involvement (PPI) panels,  
25 were involved in the development of the interventions and research procedures.  
26
  - 27 • As the study is a pilot RCT, conclusions about the efficacy of the intervention are not  
28 possible.  
29  
30  
31  
32  
33  
34  
35  
36  
37  
38  
39

40 **Keywords:** Autism; Emotional and Behavioural Difficulties; Parenting Intervention;  
41  
42 Feasibility; Pilot RCT.  
43  
44  
45  
46  
47  
48  
49  
50  
51  
52  
53  
54  
55  
56  
57  
58  
59  
60



## INTRODUCTION

### Background

Autism is characterised by difficulties in reciprocal social communication and the presence of restricted interests, repetitive behaviours and sensory anomalies.(1) At least 1% of children are autistic(2-4) and the condition is around three to four times more prevalent in males than females.(5) There are high rates of intellectual disability in autistic children with approximately 55% having an IQ below 70.(6) It has been demonstrated that additional psychiatric disorders frequently co-occur with autism at rates much higher than in the general population; up to 80-90% of young autistic children have additional emotional or behavioural difficulties meeting formal diagnostic criteria, with many having two or more additional disorders.(7-9) Anxiety disorders, attention deficit/hyperactivity disorder, and opposition defiant disorder are most common, and these difficulties tend to persist over time.(10)

Parents often report that it is these co-occurring difficulties, which are associated with poorer parental wellbeing and parental stress,(11) that they would like support with.

Universal interventions are warranted given the high prevalence of co-occurring emotional and behavioural difficulties in autistic children. However, current service provision in the United Kingdom usually includes the offer of psychoeducation groups that focus on teaching parents about autism and developing strategies to support social and communication functioning, rather than the commonly co-occurring emotional and behavioural difficulties.

Behavioural parenting interventions are recommended by the National Institute of Health and Care Excellence(12) for the treatment of behavioural difficulties displayed by young children without autism. There are a number of effective parenting interventions that aim to reduce such difficulties in young autistic children. A recent meta-analysis of eight randomised controlled trials (RCTs) of behavioural parenting interventions aiming to reduce disruptive behaviour displayed by young autistic children(13) found a moderate effect on

1  
2  
3 disruptive behaviour when compared to controls (Standardised Mean Difference=-0.59, 95%  
4 confidence interval [CI] -0.88, -0.30). However, there was significant heterogeneity in the  
5 effect of parenting interventions on disruptive behaviour which may be due to sample size,  
6 mode of delivery and the focus and duration of treatment. Only one RCT included in the  
7 review involved anxiety management techniques even though anxiety disorders are the most  
8 common co-occurring psychiatric diagnoses in autism and “behaviour that challenges” is  
9 often described as an observable manifestation of anxiety.(14,15) A recent meta-analysis of  
10 14 RCTs of cognitive behavioural therapy (CBT) interventions for anxiety in young autistic  
11 children, most of which included parental components, demonstrated that reductions in  
12 anxiety could be achieved.(16)

13  
14  
15  
16  
17  
18  
19  
20  
21  
22  
23  
24  
25  
26 In addition, only one parenting intervention reviewed by Postorino et al.(13) included  
27 group-based sessions for parents, even though groups are more scalable and have the added  
28 benefit of providing a support network for parents. More than half of the included RCTs  
29 compared parenting interventions to a waitlist control or care as usual,(13) limiting  
30 conclusions that can be drawn about the effects as participants would not be blind to  
31 treatment allocation. Being unblinded to treatment allocation is particularly problematic when  
32 self-report measures are used as primary outcomes,(17) and there is a need for objective  
33 blinded measures of behaviour to be used as outcome measures in trials aiming to reduce  
34 emotional and behavioural difficulties displayed by young autistic children.

### 35 36 37 38 39 40 41 42 43 44 45 46 47 **Aims and objectives**

48  
49 The Autism Spectrum Treatment and Resilience (ASTAR) trial is part of a research  
50 programme that aims to improve mental health outcomes among autistic individuals  
51 (Improving Autism Mental Health: <https://iamhealthkcl.net/>). ASTAR tests the specific effect  
52 of the Predictive Parenting intervention on child emotional and behavioural difficulties, in  
53 comparison to an attention control condition (psychoeducation parent groups). The aims of  
54  
55  
56  
57  
58  
59  
60

1  
2  
3 the ASTAR trial are to: (1) examine the feasibility of the intervention in terms of recruitment,  
4 retention, completion of research measures and acceptability to parents; (2) provide a  
5 preliminary indication of potential efficacy on the primary and secondary outcomes and  
6  
7 establish an effect size that could be used to power a future larger scale RCT; and (3) provide  
8 preliminary estimates of the cost-effectiveness of the intervention to inform a larger trial.  
9  
10  
11  
12  
13

14  
15 Consistent with Medical Research Council guidance on evaluating complex  
16 interventions,(18) we first conducted a preliminary feasibility phase testing the proposed  
17 research procedures and the Predictive Parenting (target intervention) and psychoeducation  
18 (control) group interventions with families with a 4-8 year old autistic child. A nested  
19 qualitative evaluation was conducted to explore the views of parents who declined to take  
20 part, those who completed/dropped-out of the interventions and the group facilitators.  
21 Findings from the feasibility phase were used to amend the research procedures and  
22 intervention manuals prior to the subsequent pilot RCT (see below for further information on  
23 learning from the feasibility phase).  
24  
25  
26  
27  
28  
29  
30  
31  
32  
33  
34

35 The primary outcome of the pilot RCT is observed child behaviour that challenges,  
36 captured during a structured researcher- and parent-child interaction assessment (see  
37 description of measure below for further details). Secondary outcomes are child compliance  
38 and child-centred and child-directive parenting captured from the same observation and  
39 parent- and teacher-report of child emotional and behavioural difficulties. We are also  
40 measuring the effects of the interventions on parental stress and wellbeing, parenting  
41 practices and parenting self-efficacy.  
42  
43  
44  
45  
46  
47  
48  
49  
50

## 51 **METHODS AND ANALYSIS**

### 52 **Learning from the feasibility phase**

53  
54 The aim of the feasibility phase was to test the proposed recruitment processes and  
55 rates, the adequacy and acceptability of proposed measures and obtain the views of parents  
56  
57  
58  
59  
60

1  
2  
3 and professionals on the research processes and interventions. Participants were 22 families  
4  
5 (91% mothers and 9% fathers) with a 4-8 year old child with a clinical diagnosis of autism  
6  
7 spectrum disorder. All but one of the children were male, and children were split across  
8  
9 mainstream ( $n=10$ ) and two special schools ( $n=12$ ). Children in the special schools groups  
10  
11 attended either a mixed autism-specific special school or a special school catering for  
12  
13 children with severe learning difficulties co-occurring with autism. As intervention content is  
14  
15 differentiated by child verbal ability, parents of minimally verbal children ( $n=12$ ) attended  
16  
17 groups separately from parents of verbal children ( $n=10$ ).  
18  
19  
20  
21

22 We recruited 22 out of our target of 24 (92%) for the feasibility phase and we retained  
23  
24 20/22 (91%) families in the research protocol to post-intervention, indicating that the research  
25  
26 processes were acceptable to families. All 22 parents gave consent for their child's teacher to  
27  
28 complete measures. Baseline teacher questionnaires were obtained for 20/22 (91%) children  
29  
30 and retention of teachers at post-intervention was high (18/22, 82%).  
31  
32

33 Parents who were interviewed reported that the research procedures were acceptable,  
34  
35 although some felt the assessment process was lengthy. Prior to commencing the pilot RCT,  
36  
37 two proposed outcome measures were removed to reduce burden on families (see our  
38  
39 ISRCTN record for a log of outcome measures tested during the feasibility phase). For some  
40  
41 parents, there appeared to have been a lack of clarity about the difference between the  
42  
43 research and clinical teams and who they would have contact with at each stage of the study.  
44  
45 This led to amendments in the information given to parents to help make this distinction  
46  
47 clearer. Findings from the qualitative interviews indicated that most parents reported that they  
48  
49 found the groups helpful and that they enjoyed meeting other parents in a similar situation.  
50  
51 Feedback on the structure, timing, course materials and homework led to modifications to the  
52  
53 Predictive Parenting intervention. For example, changes were made to make the groups more  
54  
55 accessible and relevant to parents of children with lower levels of verbal ability. The study  
56  
57  
58  
59  
60

1  
2  
3 design was also amended by increasing the number of families in each group (from six to  
4  
5 eight) as it was a more efficient way to recruit and deliver the interventions. The increased  
6  
7 group size was not thought to disrupt the intervention; indeed the slightly larger sizes may be  
8  
9 helpful for group dynamics. Further details on the feasibility study can be provided upon  
10  
11 contact with the research team.  
12  
13

### 14 **Patient and Public Involvement (PPI)**

15  
16  
17 Panels of parents of autistic children and autistic adults have been involved in all  
18  
19 phases of the study and assisted with the development of the intervention curriculums and  
20  
21 adaptations for parents of minimally verbal children, as well as advising on the research  
22  
23 procedures. Guidance and advice about language to use when speaking with parents about the  
24  
25 therapy goals and research processes (including on the written materials such as flyers and  
26  
27 information sheets) was given.  
28  
29

### 30 **Trial design**

31  
32  
33 The study is a parallel group pilot RCT. Participating families are allocated to one of  
34  
35 two treatment arms (Predictive Parenting or psychoeducational parent groups).  
36  
37 Randomisation is conducted on blocks of 10-18 families on a ratio of 1:1, resulting in groups  
38  
39 of 5-9 families in each treatment arm for any block. The randomisation algorithm is run by an  
40  
41 independent statistician within the Biostatistics and Health Informatics Department, IoPPN,  
42  
43 King's College London. Details of this are recorded in a separate randomisation specification  
44  
45 document. Intervention allocation is emailed only to the group facilitators to ensure that the  
46  
47 researchers are blind to condition.  
48  
49

50  
51 Measures are collected at baseline, up to 2 months prior to the planned randomisation  
52  
53 date, and approximately 18-24 weeks after randomisation once the 12-week intervention has  
54  
55 finished. Group differences in outcomes will be examined.  
56  
57

### 58 **Inclusion criteria**

- Parent/carer of an autistic child, as confirmed by their clinician, aged between 4:0 years and 8:11 years
- Have sufficient spoken English to access the intervention
- Agree that their family doctor can be informed of their involvement in the trial.

### **Exclusion criteria**

- Current participation in a behavioural parenting intervention delivered by another service
- Child has epileptic seizures more than weekly
- Parent or child has a severe hearing or visual impairment
- Active significant safeguarding concerns or a current severe parental psychiatric disorder
- Participation in the initial feasibility phase.

### **Interventions**

#### **Predictive Parenting (target intervention)**

Predictive Parenting builds on behavioural parenting interventions, an evidence-based, well-accepted and cost-effective approach to targeting disruptive behaviour in children without autism.(12) It also incorporates well-established parent-mediated cognitive-behavioural therapy strategies for managing child anxiety.(16) It consists of 12 weekly 2-hour groups which extend parents' understanding of autism and associated difficulties and focus on supporting parents to understand and manage their child's emotions and behaviours (see Table 1 for content covered in Predictive Parenting). Techniques for helping parents prevent and reduce disruptive behaviour and anxiety are taught. It also includes content on promoting parental self-care and stress reduction. Content is adapted based on child verbal ability (minimally verbal vs. verbal). In addition to the 12 group sessions, two individual sessions are conducted- one between sessions 2 and 4 and the other between sessions 10 and

12. These individual sessions are up to 60 minutes long and aim to support individualisation and generalisation of the strategies for each family. The intervention is conducted in the community in local child and adolescent mental health services, libraries, or schools. Further information about Predictive Parenting will be published in a separate manuscript.

Table 1. Table displaying the content covered in Predictive Parenting

| Group session | Content                                      |
|---------------|----------------------------------------------|
| 1             | Understanding ASD                            |
| 2             | Becoming a Behaviour Predictor               |
| 3             | The Power of Planning                        |
| 4             | Predictably Positive Household               |
| 5             | Clever Communication                         |
| 6             | Predictable Praise and Rewards               |
| 7             | Managing Challenging Behaviour and Meltdowns |
| 8             | Predictable Parent Action Plans              |
| 9             | Understanding Anxiety                        |
| 10            | Anxiety and Unpredictability Toolkit 1       |
| 11            | Anxiety and Unpredictability Toolkit 2       |
| 12            | Looking Forward and Looking After Yourself   |

Psychoeducational parent group (attention control condition)

The ‘Seven Cs of ASD’, the attention control condition, also consists of 12 weekly 2-hour groups that aim to provide psychoeducation and social support, whilst not providing specific guidance on managing behaviours or emotions. Table 2 below displays the content covered in each session of The Seven Cs of ASD. Like Predictive Parenting, content is adapted based on child verbal ability.

Table 2. Table displaying the content covered in The Seven Cs of ASD

| Group session | Content                                     |
|---------------|---------------------------------------------|
| 1             | Introduction and understanding ASD          |
| 2             | Causes of ASD                               |
| 3             | Concepts in ASD                             |
| 4             | Caring for yourself and your family: Part 1 |
| 5             | Caring for yourself and your family: Part 2 |
| 6             | Co-morbidities in ASD: Part 1               |
| 7             | Co-morbidities in ASD: Part 2               |
| 8             | Clinical treatments for ASD                 |
| 9             | Communication and advocating for your child |

|    |                                             |
|----|---------------------------------------------|
| 10 | Classroom considerations                    |
| 11 | Caring for yourself and your family: Part 3 |
| 12 | Recap and review                            |

## Intervention adherence

Detailed intervention manuals have been developed and frequent clinical supervision is provided to reduce variability due to therapist effects. Checklists have been developed to measure intervention fidelity, which assess session content and group process. These are completed by the group facilitators after each intervention session.

## Sample size justification

As this is a pilot RCT, a formal sample size calculation was not undertaken. We are recruiting 60 families into the pilot RCT. We expect that retention will be approximately 90%, as reported by other trials of psychological intervention conducted with parents of young autistic children. We expect a more modest effect size than the 1.3 reported by Sofronoff et al.(19) as this was for a parent-reported measure and therefore unblinded. For the comparison of Predictive Parenting and the attention control condition, power was calculated by a non-central chi-square method using a linear mixed model with baseline (baseline-outcome correlation assumed 0.7) as covariate for two-tailed  $p=.05$  and intraclass correlation for within intervention group of 0.02 and 10% drop-out. For an effect size (ES) of 0.5, our study has an expected 95% CI of 0.08, 0.92 and power of 64%, while for an ES of 0.6 the expected 95% CI is 0.18, 1.02 and 79% power.

## Outcomes

Table 3 below displays measures that are being used in the trial and when they are administered.

### Primary outcome

The primary outcome measure is child behaviour that challenges displayed during an observation of researcher-child and parent-child interactions. We have developed the



1  
2  
3 Observation Schedule for Children with Autism – Anxiety and Behaviour (OSCA–AB) for  
4 the trial drawing on existing well-validated observational measures of parent-child  
5 interaction.(20-23) Two researcher-led and six parent-led tasks are completed during the 20-  
6 25 minute observation. Tasks aim to simulate everyday challenges that autistic children may  
7 face and find difficult. The frequency of a range of child behaviour that challenges  
8 (destructive behaviour, aggression towards themselves and others, frustrated vocalisations,  
9 non-compliance, avoidance and reassurance seeking) observed during the OSCA–AB are  
10 coded. As the length of the observation varies, the rate of child behaviour that challenges per  
11 minute is calculated. Further information about the measure will be published in a separate  
12 manuscript.  
13  
14  
15  
16  
17  
18  
19  
20  
21  
22  
23  
24  
25

## 26 Secondary outcomes

### 27 *Observed child compliance*

28  
29  
30 The frequency of observed child compliance during the OSCA–AB is coded and the  
31 rate of child compliance per minute is calculated.  
32  
33

### 34 *Observed parent behaviour*

35  
36  
37 Frequencies of a range of observed parent behaviour (e.g., positive and negative  
38 comments, commands, giving the child opportunity to comply, praise, physical handling and  
39 supportive physical guidance) during the OSCA-AB are coded and differences between  
40 groups will be examined. Child-centred parenting behaviours (positive comments, clear  
41 commands, praise and supportive physical guidance) and child-directive parenting behaviours  
42 (negative comments, unclear commands, no opportunity to comply and physical handling)  
43 are summed to produce total child-centred parenting behaviour and child-directive parenting  
44 behaviour scores. Due to variation in the length of the observation, rates of child-centred and  
45 child-directive parenting behaviours per minute are calculated. The proportion of child-  
46  
47  
48  
49  
50  
51  
52  
53  
54  
55  
56  
57  
58  
59  
60

1  
2  
3 centred parenting behaviour / child-centred and child-directive parenting behaviours is also  
4  
5 calculated.

6  
7  
8 *Parent-reported child emotional and behavioural difficulties*

9  
10 Parent-rated child emotional and behavioural difficulties is measured using The  
11  
12 Aberrant Behaviour Checklist (ABC)(24) Irritability and Hyperactivity subscales. The  
13  
14 Assessment of Concerning Behaviours (ACB) scale,(25) a measure of child mental health  
15  
16 and concerning behaviours developed specifically for use with autistic individuals, is also  
17  
18 completed. Forty-four items are rated on a 5-point sliding scale anchored by opposing  
19  
20 responses ('not at all' and 'very much'). The Home Situations Questionnaire-Autism  
21  
22 Spectrum Disorders (HSQ-ASD),(26) an autism-specific measure of child non-compliance in  
23  
24 everyday situations is also administered. Parent-reported child anxiety is measured using the  
25  
26 Preschool Anxiety Scale Revised (PASR),(27) which taps into specific fears, and generalised,  
27  
28 social and separation anxiety.  
29  
30  
31

32  
33 A narrative describing one or two of the most pressing problems for parents related to  
34  
35 child emotions and behaviours (Parent-Nominated Target Problems) is elicited at baseline.  
36  
37 Information on the presentation, frequency, duration, intensity and interference with daily  
38  
39 function, family life and other consequences is sought.(28) The narratives are reviewed at  
40  
41 post-intervention and change from baseline is scored on a 9-point scale. The Clinical Global  
42  
43 Impression-Improvement (CGI-I)(29) is used to rate overall improvement in child emotional  
44  
45 and behavioural difficulties based on the parent-nominated target problems and parental  
46  
47 perceptions of improvement.  
48  
49  
50

51  
52 *Teacher-reported child emotional and behavioural difficulties*

53  
54 The ABC(24) Irritability and Hyperactivity subscales is completed by the child's  
55  
56 teacher or someone involved in their education (e.g., key worker, Special Educational Needs  
57  
58 Co-ordinator). The teacher version of the ACB(25) is also completed.  
59  
60

### *Parent-reported parenting outcomes*

Parent-rated parenting stress associated with core and co-morbid symptoms is measured using the Autism Parenting Stress Index (APSI)(30) and parenting self-efficacy is measured using the Child Adjustment and Parent Efficacy Scale-Developmental Disability (CAPES-DD) Parent Efficacy subscale,(31) a 16-item scale assessing confidence in managing specific child behaviours. The Short Warwick-Edinburgh Mental Wellbeing Scale (SWEMWBS)(32) assesses parent reports of their own wellbeing. The short version of the Parenting Scale (PS)(33) is used to measure self-reported lax and overreactive parenting practices.

### Sample characterisation measures

Demographic information about the family is obtained at baseline. Autism severity is measured at baseline only using the parent-reported Social Communication Questionnaire-Lifetime version (SCQ-L)(34), along with the ADOS-2.(35) The ADOS-2 is the gold standard observation for assessing autism symptoms and is administered by trained researchers. The Adaptive Behaviour Assessment System – 3<sup>rd</sup> edition (ABAS-3)(36) is completed by parents at baseline and measures three broad domains of adaptive skills and functioning (conceptual, social and practical), resulting in a General Adaptive Composite score.

### Intervention related measures

Attendance at intervention sessions and retention in the intervention is recorded. Satisfaction with the content and delivery of both interventions is measured using questionnaires developed for study.

### Health economic measures

Parental wellbeing and daily emotions are measured using the Office of National Statistics (ONS) Personal Wellbeing questions(37) which ask about life satisfaction, worth,

happiness, and anxiety. The EQ-5D-5L(38) is used to measure parent reports of their own health-related quality of life, and index-based values are available to enable quality-adjusted life years (QALYs) calculations to be used in the cost-effectiveness analysis.

An adapted version of the Client Service Receipt Inventory (CSRI)(39) measures service use and cost-related impacts at baseline and post-intervention, to inform the cost-effectiveness analysis. Parents are asked to retrospectively identify all public, private and voluntary sector services used by the child, as well as services used by other family members that are linked to the child's autism or emotional and behavioural difficulties. The CSRI also includes information on unpaid support and employment impacts on other family members. The facilitators delivering the interventions track their time spent on intervention-related activities and travel costs to be used in costing the interventions.

Table 3. Table showing administration of measures.

| Measure                                         | Baseline | During treatment | Post-intervention | Completed by              |
|-------------------------------------------------|----------|------------------|-------------------|---------------------------|
| <b>Primary outcome</b>                          |          |                  |                   |                           |
| OSCA-AB Child Behaviour That Challenges         | ✓        |                  | ✓                 | Blinded researcher        |
| <b>Secondary outcomes</b>                       |          |                  |                   |                           |
| OSCA-AB Child Compliance                        | ✓        |                  | ✓                 | Blinded researcher        |
| OSCA-AB Child-Centred Parenting Behaviour       | ✓        |                  | ✓                 | Blinded researcher        |
| OSCA-AB Child-Directive Parenting Behaviour     | ✓        |                  | ✓                 | Blinded researcher        |
| ABC Irritability and Hyperactivity              | ✓        |                  | ✓                 | Parent/teacher            |
| ACB                                             | ✓        |                  | ✓                 | Parent/teacher            |
| HSQ-ASD                                         | ✓        |                  | ✓                 | Parent                    |
| PASR                                            | ✓        |                  | ✓                 | Parent                    |
| Improvement in Parent-Nominated Target Problems | ✓        |                  | ✓                 | Parent/blinded researcher |
| CGI-I                                           | ✓        |                  | ✓                 | Parent/blinded researcher |
| APSI                                            | ✓        |                  | ✓                 | Parent                    |

|                                                                                                                                                                                                                                                                                                                                                                                                                                                                                                                                                                                                                                                                                                                                                                                                                   |                           |   |   |   |                           |
|-------------------------------------------------------------------------------------------------------------------------------------------------------------------------------------------------------------------------------------------------------------------------------------------------------------------------------------------------------------------------------------------------------------------------------------------------------------------------------------------------------------------------------------------------------------------------------------------------------------------------------------------------------------------------------------------------------------------------------------------------------------------------------------------------------------------|---------------------------|---|---|---|---------------------------|
|                                                                                                                                                                                                                                                                                                                                                                                                                                                                                                                                                                                                                                                                                                                                                                                                                   | CAPES-DD Parent Efficacy  | ✓ |   | ✓ | Parent                    |
|                                                                                                                                                                                                                                                                                                                                                                                                                                                                                                                                                                                                                                                                                                                                                                                                                   | SWEMWBS                   | ✓ |   | ✓ | Parent                    |
|                                                                                                                                                                                                                                                                                                                                                                                                                                                                                                                                                                                                                                                                                                                                                                                                                   | PS                        | ✓ |   | ✓ | Parent                    |
|                                                                                                                                                                                                                                                                                                                                                                                                                                                                                                                                                                                                                                                                                                                                                                                                                   | Adverse events            |   |   | ✓ | Parent/blinded researcher |
| <b>Sample characterisation</b>                                                                                                                                                                                                                                                                                                                                                                                                                                                                                                                                                                                                                                                                                                                                                                                    |                           |   |   |   |                           |
|                                                                                                                                                                                                                                                                                                                                                                                                                                                                                                                                                                                                                                                                                                                                                                                                                   | Demographics              | ✓ |   |   | Parent                    |
|                                                                                                                                                                                                                                                                                                                                                                                                                                                                                                                                                                                                                                                                                                                                                                                                                   | SCQ-Lifetime              | ✓ |   |   | Parent                    |
|                                                                                                                                                                                                                                                                                                                                                                                                                                                                                                                                                                                                                                                                                                                                                                                                                   | ADOS-2                    | ✓ |   |   | Blinded researcher        |
|                                                                                                                                                                                                                                                                                                                                                                                                                                                                                                                                                                                                                                                                                                                                                                                                                   | ABAS-3                    | ✓ |   |   | Parent                    |
| <b>Intervention related measures</b>                                                                                                                                                                                                                                                                                                                                                                                                                                                                                                                                                                                                                                                                                                                                                                              |                           |   |   |   |                           |
|                                                                                                                                                                                                                                                                                                                                                                                                                                                                                                                                                                                                                                                                                                                                                                                                                   | Intervention attendance   |   | ✓ |   | Clinician                 |
|                                                                                                                                                                                                                                                                                                                                                                                                                                                                                                                                                                                                                                                                                                                                                                                                                   | Intervention satisfaction |   |   | ✓ | Parent                    |
|                                                                                                                                                                                                                                                                                                                                                                                                                                                                                                                                                                                                                                                                                                                                                                                                                   | Intervention fidelity     |   | ✓ |   | Clinician                 |
| <b>Health economics measures</b>                                                                                                                                                                                                                                                                                                                                                                                                                                                                                                                                                                                                                                                                                                                                                                                  |                           |   |   |   |                           |
|                                                                                                                                                                                                                                                                                                                                                                                                                                                                                                                                                                                                                                                                                                                                                                                                                   | ONS Personal Wellbeing    | ✓ |   | ✓ | Parent                    |
|                                                                                                                                                                                                                                                                                                                                                                                                                                                                                                                                                                                                                                                                                                                                                                                                                   | EQ-5D-5L Quality of Life  | ✓ |   | ✓ | Parent                    |
|                                                                                                                                                                                                                                                                                                                                                                                                                                                                                                                                                                                                                                                                                                                                                                                                                   | CSRI                      | ✓ |   | ✓ | Parent/blinded researcher |
|                                                                                                                                                                                                                                                                                                                                                                                                                                                                                                                                                                                                                                                                                                                                                                                                                   | Facilitator time use      |   | ✓ |   | Clinician                 |
| <p><i>Note.</i><br/>           ABAS-3=Adaptive Behaviour Assessment System – 3<sup>rd</sup> edition; ABC=Aberrant Behaviour Checklist; ACB=Assessment of Concerning Behaviour; ADOS-2=Autism Diagnostic Observation Schedule – 2<sup>nd</sup> edition; APSI=Autism Parenting Stress Index; CAPES-DD=Child Adjustment and Parent Efficacy Scale-Developmental Disability; CGI-I=Clinical Global Impression-Improvement; CSRI= Client Service Receipt Inventory; HSQ-ASD=Home Situations Questionnaire-Autism Spectrum Disorders; ONS=Office of National Statistics; OSCA-AB=Observation Schedule for Children with Autism – Anxiety and Behaviour; PASR= Preschool Anxiety Scale Revised; PS= Parenting Scale; SWEMWBS=Short Warwick-Edinburgh Mental Wellbeing Scale; SCQ=Social Communication Questionnaire.</p> |                           |   |   |   |                           |

## Procedure

Children between the ages of 4 and 8 years with a diagnosis of autism spectrum disorder (ASD) are recruited to the study from participating services following referral via local autism diagnostic teams, education professionals, support groups and consented databases. Potential participants can also self-refer. As the intervention content is adapted based on child verbal ability, the groups are run separately with parents of minimally verbal

1  
2  
3 and verbal children within each of our localities. Therefore, the blocks of 10-18 families  
4 recruited for allocation to condition will be stratified by verbal ability level (minimally verbal  
5 [defined as Autism Diagnostic Observation Schedule – 2<sup>nd</sup> edition, ADOS–2(35) Module 1]  
6 vs. verbal children [defined as ADOS–2 Module 2 or above]) and by locality (Croydon,  
7 Bromley) as part of the recruitment procedure.  
8  
9  
10  
11  
12  
13

14  
15 After initial contact and pre-screening for eligibility, research staff obtain informed  
16 consent and conduct baseline assessments to confirm eligibility. All families are assigned a  
17 unique participant ID. Questionnaire measures are completed online or in hard copy  
18 depending on the parent’s preference. Other measures are completed during a visit to the  
19 research setting, over the phone or at the child’s school. Baseline assessments with families  
20 are conducted up to 2 months prior to randomisation. With parental consent, teachers are  
21 asked to complete questionnaires about the child’s emotional and behavioural difficulties at  
22 school. Post-intervention assessments are conducted after the completion of the intervention.  
23 Outcome measures are sought for all families regardless of their participation in the treatment  
24 provided.  
25  
26  
27  
28  
29  
30  
31  
32  
33  
34  
35  
36  
37

38 There are separate research and clinical teams who are based in different buildings  
39 and have separate supervision structures. The assessments and interventions are conducted in  
40 a way to avoid inadvertent divulging of information that could reveal allocation status. The  
41 location and materials used during the research assessments are different in type and location  
42 to those used for the intervention sessions, avoiding any familiarity effect for parents.  
43 Researchers involved in conducting the assessments and rating outcome measures are blind to  
44 intervention content and participant condition. Group facilitators are blind to primary  
45 outcome measurement.  
46  
47  
48  
49  
50  
51  
52  
53  
54  
55

#### 56 **Data management, confidentiality and access**

57  
58  
59  
60

1  
2  
3 All data in the trial are anonymised. All paper records are filed anonymously by the  
4 participant's unique study number in secure locked cabinets in the Department of Child and  
5 Adolescent Psychiatry, IoPPN, King's College London. Consent forms are stored separately.  
6  
7 Personal details (e.g., name, address, telephone numbers) are stored in a separate encrypted  
8 database and linked by initial, date of birth and unique participant ID number. Some records  
9  
10 from the feasibility phase are stored securely at York University.  
11  
12  
13  
14  
15  
16

17 Data from paper case report forms are entered on SPSS databases and along with  
18 other electronic data, stored on a King's server folder that is only accessible to the research  
19 team. Double data entry will be completed on at least 10% of all entered data and quality  
20 checks will be conducted. The principal investigator, trial statisticians and other members of  
21 the study team have access to final datasets and will undertake analysis as appropriate and  
22 necessary. Any arrangements for other researchers to have access to the data will be  
23 negotiated separately and the Central Office of Research Ethics Committee will be informed.  
24  
25  
26  
27  
28  
29  
30  
31  
32

### 33 **Statistical analyses**

34 A statistical analysis plan has been written by the trial statisticians (AP and DS) and  
35 will be approved by the chief investigator, the Trial Steering Committee (TSC) and the Data  
36 Monitoring Committee (DMC) prior to any analysis being undertaken. The analyses will be  
37 carried out using Stata.  
38  
39  
40  
41  
42  
43  
44

45 In accordance with CONSORT guidelines, we will report the flow of participants  
46 through the trial. Descriptive statistics of recruitment, drop-out and completeness of  
47 assessments and interventions will be provided. Satisfaction and fidelity of the intervention  
48 will also be reported descriptively. Baseline characteristics will be presented by group.  
49  
50  
51  
52  
53

54 The main analysis will be via intention-to-treat, including all participants who were  
55 randomised. It will use statistical techniques for handling missing outcome data under a  
56 missing at random assumption and multiple imputation for missing measures will be  
57  
58  
59  
60

1  
2  
3 considered. We will test for a between-group change in the primary outcome at post-  
4  
5 intervention, using ANCOVA regression predicting outcome where post-intervention is also  
6  
7 covaried for baseline. Dummy variables will be used to account for randomisation  
8  
9 stratification and the clustering effects of groups. The distribution of the primary outcome at  
10  
11 baseline will be examined for evidence of floor effects. Where floor effects are present, a  
12  
13 generalised mixed model/structural equation modelling setup, in which both baseline and  
14  
15 post-intervention are modelled as potentially censored response variables, will be used with a  
16  
17 covariance between equations that yields the ANCOVA estimate of treatment effect in the  
18  
19 absence of censoring. Secondary outcome measures will be analysed in the same way.  
20  
21  
22 Analysis of all post-intervention treatment effects will be undertaken after all post-  
23  
24 intervention outcome measures are completed. Trial statisticians will remain blind until after  
25  
26 the primary and secondary outcomes are analysed.  
27  
28  
29

### 30 Economic evaluation

31  
32  
33 The cost for each participant in the pilot will be derived by the product of the quantity  
34  
35 of each service and support used and the unit cost of each of them. Unit costs will be based  
36  
37 on the economic notion of opportunity costs – which considers the value of the resource in its  
38  
39 next best alternative use. Where this is not practicable, unit costs will be approximated by  
40  
41 nationally representative health and personal social services tariffs. Where unit costs are not  
42  
43 readily available from such sources, we will derive costs using approaches outlined in an  
44  
45 annual compendium of Unit Cost of Health and Social Care. We will use the most recent  
46  
47 publication of the *Unit Cost of Health and Social Care* produced by the Personal Social  
48  
49 Services Research Unit at the time of analysis. All other reported costs will be consistent with  
50  
51 the price level used in that edition.(40)  
52  
53  
54

55  
56 When applying unit costs to unpaid care, we will use other approaches such as  
57  
58 replacement costs. Under this approach, unpaid care by family and other carers will be costed  
59  
60



1  
2  
3 using the average hourly rate for a local authority home care worker as the assumed cost for  
4 each hour of unpaid informal care.  
5  
6

7  
8 Consistent with the outcome analyses, the economic evaluation will also conduct an  
9  
10 intention-to-treat analysis, including all participants who were randomised. We will compute  
11  
12 and compare comprehensively measured costs (for each of the two perspectives adopted:  
13  
14 health and social care, public sector or societal) for the two interventions. Under each  
15  
16 perspective, the cost-effectiveness analyses will bring together costs and the primary outcome  
17  
18 and will compute indicative incremental cost-effectiveness ratios and net benefits; the  
19  
20 societal perspective will be adopted in the main analyses. In a secondary economic  
21  
22 evaluation, QALY gains computed from parental EQ-5D-5L scores will be compared with  
23  
24 costs from each perspective; again, the societal perspective will be adopted to facilitate  
25  
26 comparisons with the main analyses. Other exploratory cost-effectiveness analyses will  
27  
28 examine other outcomes and perspectives.  
29  
30  
31  
32

33 In each case, an incremental cost-effectiveness ratio will be computed as the mean  
34  
35 cost difference between Predictive Parenting and the attention control condition divided by  
36  
37 the mean difference in change in measures of outcome respectively. If one treatment is  
38  
39 indicating it is likely to be both more effective and costlier than the other, we would consider  
40  
41 if there is some suggestion that it is worth incurring the higher costs in order to achieve the  
42  
43 improved outcomes. The approach we will employ to reveal the nature of trade-offs such as  
44  
45 these – and to represent the inherent uncertainty in any evaluation – will be to plot cost-  
46  
47 effectiveness acceptability curves generated from bootstrap analyses. Sensitivity analyses will  
48  
49 explore the impact of key assumptions such as the costing of unpaid care time and lost  
50  
51 productivity, and the choice of outcome.  
52  
53  
54  
55

## 56 **ETHICS AND DISSEMINATION**

57  
58  
59  
60

1  
2  
3 Ethical approval was granted from NHS Camden and Kings Cross Research Ethics  
4  
5 Committee on 18/11/2016 (ref: 16/LO/1769). Written consent is obtained from all  
6  
7 participating parents. Assent from children is obtained where appropriate. The SPIRIT  
8  
9 reporting guidelines are followed for this protocol.(41)  
10  
11

12 For the pilot RCT, we formed a TSC which includes an independent chair,  
13  
14 independent members and parent representatives (see below for membership). The TSC met  
15  
16 prior to the commencement of the pilot RCT to agree the study protocol and will meet at least  
17  
18 annually thereafter. The TSC were consulted on the study protocol, techniques for  
19  
20 ascertainment and the focus of measurement including the primary outcome. They were also  
21  
22 consulted on whether a DMC is required and decided that a sub-committee of the TSC  
23  
24 (consisting of the chair and statistician) could act as the DMC.  
25  
26  
27

28 Adverse events are measured at post-intervention and include events related to child,  
29  
30 parent and family wellbeing that may not be captured by outcome measures (e.g., increased  
31  
32 family discord, school refusal, significant change in a sibling's wellbeing or behaviour) as  
33  
34 well as pre-defined standard medical events. Such events that arise during treatment are  
35  
36 documented when a situation becomes known to group facilitators. The TSC and DMC have  
37  
38 independent oversight of the study and are informed of all adverse events.  
39  
40  
41  
42

43 This trial will contribute to the literature on parenting interventions for reducing  
44  
45 emotional and behavioural difficulties displayed by young autistic children. As the study is a  
46  
47 pilot RCT, conclusions about the efficacy of the intervention are not possible. However, the  
48  
49 study design enables us to consider the feasibility of conducting a large-scale RCT to test the  
50  
51 efficacy of Predictive Parenting. The findings from the pilot RCT will be disseminated  
52  
53 through publication in peer-reviewed journals of general and special interest and  
54  
55 presentations at national and international conferences. There will also be a general  
56  
57  
58  
59  
60

1  
2  
3 dissemination programme for families including participants co-ordinated through our  
4  
5 collaborators in the National Autistic Society.  
6  
7  
8  
9  
10  
11  
12  
13  
14  
15  
16  
17  
18  
19  
20  
21  
22  
23  
24  
25  
26  
27  
28  
29  
30  
31  
32  
33  
34  
35  
36  
37  
38  
39  
40  
41  
42  
43  
44  
45  
46  
47  
48  
49  
50  
51  
52  
53  
54  
55  
56  
57  
58  
59  
60

For peer review only

## TRIAL STATUS

Protocol version 1.4, dated 04/02/2019, see our ISRCTN record for log of protocol amendments. Recruitment was completed on the 16/10/2018. Post-intervention assessments are due for completion by 30/04/2019.

## TRIAL SPONSOR

King's College London and South London and Maudsley NHS Foundation Trust. Email: slam-ioppn.research@kcl.ac.uk.

## TRIAL STEERING COMMITTEE

Professor Alan Stein, University of Oxford (Chair); Dr Matt Sydes, MRC Clinical Trials Unit, University College London (Member); Dr Jacqueline Rodgers, University of Newcastle (Member); Bridget Gilchrist (Parent Representative); Lindsay Stairs (Parent Representative).

## DATA MONITORING COMMITTEE

As the trial is a pilot RCT, the TSC agreed that a subgroup consisting of Professor Alan Stein and Dr Matt Sydes would act as the DMC for ASTAR.

## ACKNOWLEDGEMENTS

We are grateful to the families who were involved in the initial feasibility study and to those who are involved in the pilot trial. We would like to thank other members of the IAMHealth consortium for their comments and advice on the trial design. We would also like to thank local professionals who assisted with identifying potential participants, with particular thanks to Dr Shade Alu, Sarran Bond, Marion Drennan, Dr Mark O'Leary, Dr Fernando Salazar and Jackie Sutherland. We would also like to acknowledge Katherine Appleby, Elena Baker,

1  
2  
3 Emma Biggin, Sophie Carruthers, Margot Frayne, Lydia Johnson-Ferguson, Moriya  
4  
5 Maccabee and Sophie Webb for their assistance with data collection.  
6  
7  
8  
9

## 10 **AUTHORS' CONTRIBUTIONS**

11  
12 MP, JT, JPP, RR, DS, BB, MK, VS, AP, ES, SS and TC were involved in designing the study  
13  
14 and drafting the protocol for the pilot RCT. TCa is involved in recruiting and collecting data  
15  
16 for the pilot RCT. VH, JM, LB and MH are involved in developing and delivering the  
17  
18 interventions. The manuscript was drafted by MP and all authors read, made revisions and  
19  
20 approved the final version.  
21  
22  
23  
24  
25

## 26 **FUNDING STATEMENT**

27  
28 This trial summarises independent research funded by the National Institute for Health  
29  
30 Research (NIHR) under its Programme Grants for Applied Research programme (RP-PG-  
31  
32 1211-20016). The views expressed in this presentation are those of the authors and not  
33  
34 necessarily those of the NHS, the NIHR or the Department of Health. Additional funding for  
35  
36 intervention materials was received from the Maudsley Charity (1157). MK receives support  
37  
38 from the NIHR School for Social Care Research. AP receives support from the NIHR  
39  
40 through a Senior Investigator Award (NF-SI-0617-10120). ES additionally receives support  
41  
42 from the National Institute for Health Research (NIHR) Biomedical Research Centre at South  
43  
44 London and Maudsley Foundation Trust (IS-BRC-1215-20018), the NIHR through a Senior  
45  
46 Investigator Award (NF-SI-0514-10073), the European Union Innovative Medicines  
47  
48 Initiative (EU-IMI 115300), Autistica (7237), Medical Research Council (MR/R000832/1,  
49  
50 MR/P019293/1), the Economic and Social Research Council (ESRC 003041/1), Guy's and St  
51  
52 Thomas' Charitable Foundation (GSTT EF1150502) and the Maudsley Charity. TC receives  
53  
54  
55  
56  
57  
58  
59  
60

1  
2  
3 grant or research support from the NIHR, the Medical Research Council, the European Union  
4  
5 (IMI, H2020), Autistica, MQ and The Waterloo Foundation.  
6  
7  
8  
9

### 10 **COMPETING INTERESTS**

11  
12 AP declares that he receives royalties from WPS for the Social Communication  
13  
14 Questionnaire.  
15  
16

### 17 **PATIENT CONSENT**

18  
19  
20  
21 Obtained.  
22  
23

### 24 **ETHICAL APPROVAL**

25  
26  
27  
28 Obtained from NHS Camden and Kings Cross Research Ethics Committee (ref: 16/LO/1769).  
29  
30  
31

### 32 **PROVENANCE AND PEER REVIEW**

33  
34  
35 Not commissioned; externally peer reviewed for funding and subsequently ethical approval  
36  
37 prior to submission.  
38  
39  
40  
41  
42  
43  
44  
45  
46  
47  
48  
49  
50  
51  
52  
53  
54  
55  
56  
57  
58  
59  
60

## REFERENCES

- 1  
2  
3  
4  
5  
6  
7 (1) American Psychiatric Association. Diagnostic and Statistical Manual of Mental  
8 Disorders: DSM-5 (5th ed.). Arlington, VA: American Psychiatric Association 2013.  
9
- 10 (2) Baird G, Simonoff E, Pickles A, et al. Prevalence of disorders of the autism spectrum in a  
11 population cohort of children in South Thames: the Special Needs and Autism Project  
12 (SNAP). *Lancet* 2006;368:210–215.  
13
- 14 (3) Baio J, Wiggins L, Christensen DL, et al. Prevalence of autism spectrum disorder among  
15 children aged 8 years - Autism and Developmental Disabilities Monitoring Network, 11  
16 Sites, United States, 2014. *MMWR Surveill* 2018;67:1–23.  
17
- 18 (4) Russell G, Rodgers LR, Ukoumunne OC, et al. Prevalence of parent-reported ASD and  
19 ADHD in the UK: Findings from the Millennium Cohort Study. *J Autism Dev Disord*  
20 2014;44:31–40.  
21
- 22 (5) Loomes R, Hull L, Mandy WPL. What is the male-to-female ratio in autism spectrum  
23 disorder? A systematic review and meta-analysis. *J Am Acad Child Adolesc Psychiatry* 2017  
24 ;56:466–474.  
25
- 26 (6) Charman T, Pickles A, Simonoff E, et al. IQ in children with autism spectrum disorders:  
27 data from the Special Needs and Autism Project (SNAP). *Psychol Med* 2011;41:619–627.  
28
- 29 (7) Salazar F, Baird G, Chandler S, et al. Co-occurring psychiatric disorders in preschool and  
30 elementary school-aged children with autism spectrum disorder. *J Autism Dev Disord*  
31 2015;40:1080–1093.  
32
- 33 (8) Chandler S, Howlin P, Simonoff E, et al. Emotional and behavioural problems in young  
34 children with autism spectrum disorder. *Dev Med Child Neurol* 2016;58:202–208.  
35
- 36 (9) Simonoff E, Pickles A, Charman T, et al. Psychiatric disorders in children with autism  
37 spectrum disorders: Prevalence, comorbidity, and associated factors in a population-derived  
38 sample. *J Am Acad Child Adolesc Psychiatry* 2008;47:921–929.  
39
- 40 (10) Simonoff E, Jones C R, Baird G, et al. The persistence and stability of psychiatric  
41 problems in adolescents with autism spectrum disorders. *J Child Psychol Psychiatry*  
42 2013;54:186–194.  
43
- 44 (11) Yorke I, White P, Weston A, et al. The association between emotional and behavioral  
45 problems in children with autism spectrum disorder and psychological distress in their  
46 parents: A systematic review and meta-analysis. *J Autism Dev Disord* 2018;48:3393–3415.  
47
- 48 (12) National Institute for Health and Clinical Excellence. Antisocial behaviour and conduct  
49 disorders in children and young people: Recognition and management (CG158). 2013.  
50 <https://www.nice.org.uk/guidance/cg158>  
51  
52  
53  
54  
55  
56  
57  
58  
59  
60

- 1  
2  
3 (13) Postorino V, Sharp WG, McCracken CE, et al. A systematic review and meta-analysis of  
4 parent training for disruptive behavior in children with autism spectrum disorder. *Clin Child*  
5 *Fam Psychol Rev* 2017;20:391–402.  
6  
7  
8 (14) Ozsivadjian A, Knott FF, Magiati I. Parent and child perspectives on the nature of  
9 anxiety in children and young people with autism spectrum disorders: A focus group study.  
10 *Autism* 2012;16:107–121.  
11  
12 (15) Bearss K, Taylor CA, Aman MG, et al. Using qualitative methods to guide scale  
13 development for anxiety in youth with autism spectrum disorder. *Autism* 2015;20:663–672.  
14  
15  
16 (16) Ung D, Selles R, Small BJ, et al. A systematic review and meta-analysis of cognitive-  
17 behavioral therapy for anxiety in youth with high-functioning autism spectrum disorders.  
18 *Child Psychiatry Hum Dev* 2015;46:533–547.  
19  
20 (17) Sonuga-Barke EJ, Brandeis D, Cortese S, et al. Nonpharmacological interventions for  
21 ADHD: Systematic review and meta-analyses of randomized controlled trials of dietary and  
22 psychological treatments. *Am J Psychiatry* 2013;170:275–289.  
23  
24 (18) Craig P, Dieppe P, Macintyre S, et al. Developing and evaluating complex interventions:  
25 The new Medical Research Council guidance. *BMJ* 2008;337:a1655.  
26  
27 (19) Sofronoff K, Attwood T, Hinton S. A randomised controlled trial of a CBT intervention  
28 for anxiety in children with asperger syndrome. *J Child Psychol Psychiatry* 2005;46:1152–  
29 1160.  
30  
31 (20) Wakschlag LS, Hill C, Carter AS, et al. Observational assessment of preschool  
32 disruptive behavior, part I: Reliability of the Disruptive Behavior Diagnostic Observation  
33 Schedule (DB-DOS). *J Am Acad Child Adolesc Psychiatry* 2008;47:622–631.  
34  
35 (21) Robinson EA, Eyberg SM. The dyadic parent-child interaction coding system:  
36 Standardization and validation. *J Consult Clin Psychol* 1981;49:245–250.  
37  
38 (22) Johnson CR, Butter EM, Handen BL et al. Standardised Observation Analogue  
39 Procedure (SOAP) for assessing parent and child behaviours in clinical trials. *J Intellect Dev*  
40 *Disabil* 2009;34:230–238.  
41  
42 (23) Mian ND, Carter AS, Pine DS, et al. Development of a novel observational measure for  
43 anxiety in young children: The Anxiety Dimensional Observation Scale. *J Child Psychol*  
44 *Psychiatry* 2015;56:1017–1025.  
45  
46 (24) Aman MG, Singh NN, Stewart AW, et al. The Aberrant Behavior Checklist: A behavior  
47 rating scale for the assessment of treatment effects. *Am J Ment Defic* 1985;89:485–491.  
48  
49 (25) Santosh P, Tarver J, Gibbons F, et al. Protocol for the development and validation of a  
50 questionnaire to assess concerning behaviours and mental health in individuals with autism  
51 spectrum disorders: The Assessment of Concerning Behaviour (ACB) scale. *BMJ Open*  
52 2016;6:e010693.  
53  
54  
55  
56  
57  
58  
59  
60



- 1  
2  
3 (26) Chowdhury M, Aman MG, Lecavalier L, et al. Factor structure and psychometric  
4 properties of the revised Home Situations Questionnaire for autism spectrum disorder: The  
5 Home Situations Questionnaire-Autism Spectrum Disorder. *Autism* 2015;54:281–291.  
6  
7  
8 (27) Edwards SL, Rapee RM, Kennedy SJ, et al. The assessment of anxiety symptoms in  
9 preschool-aged children: The revised Preschool Anxiety Scale. *J Clin Child Adolesc Psychol*  
10 2010;39:400–409.  
11  
12 (28) Arnold LE, Vitiello B, McDougle C, et al. Parent-defined target symptoms respond to  
13 risperidone in RUPP autism study: Customer approach to clinical trials. *J Am Acad Child*  
14 *Adolesc Psychiatry* 2003;42:1443-1450.  
15  
16 (29) Guy W. ECDEU Assessment Manual for Psychopharmacology: Publication ADM 76-  
17 338. 1976.  
18  
19 (30) Silva LM, Schalock M. Autism Parenting Stress Index: Initial psychometric evidence. *J*  
20 *Autism Dev Disord* 2012;42:566–574.  
21  
22 (31) Emser TS, Mazzucchelli TG, Christiansen H, et al. Child Adjustment and Parent  
23 Efficacy Scale-Developmental Disability (CAPES-DD): First psychometric evaluation of a  
24 new child and parenting assessment tool for children with a developmental disability. *Res*  
25 *Dev Disabil* 2016;53-54:158–177.  
26  
27 (32) NHS Health Scotland, University of Warwick and University of Edinburgh. Short  
28 Warwick Edinburgh Mental Well-Being Scale (SWEMWBS). 2008.  
29 <https://warwick.ac.uk/fac/sci/med/research/platform/wemwbs/development/swemwbs/>  
30  
31 (33) Arnold DS, O'Leary SG, Wolff LS, et al. The Parenting Scale: A measure of  
32 dysfunctional parenting in discipline situations. *Psychol Assess* 1993;5:137–144.  
33  
34 (34) Rutter M, Bailey A, Lord C. Social Communication Questionnaire. Los Angeles, CA:  
35 Western Psychological Services 2003.  
36  
37 (35) Lord C, Rutter M, DiLavore PC, et al. Autism Diagnostic Observation Schedule (2nd  
38 ed.). Torrance, CA: Western Psychological Services 2012.  
39  
40 (36) Harrison P, Oakland T. Adaptive Behavior Assessment System (ABAS-3) (3rd ed.) Los  
41 Angeles, CA: Western Psychological Services 2015.  
42  
43 (37) Office of National Statistics. Measuring national well-being: Personal wellbeing in the  
44 UK, 2014 to 2015 (Statistical Bulletin). 2015.  
45 <https://www.ons.gov.uk/peoplepopulationandcommunity/wellbeing/bulletins/measuringnationalwellbeing/2015-09-23>  
46  
47 (38) EuroQol Group. EuroQol--A new facility for the measurement of health-related quality  
48 of life. *Health Policy* 1990;16:199–208.  
49  
50 (39) Beecham J, Knapp M. Costing psychiatric interventions. In: Thornicroft G, ed.  
51 Measuring Mental Health Needs (2nd ed). London: Royal College of Psychiatrists 2001:200–  
52 224.  
53  
54  
55  
56  
57  
58  
59  
60

1  
2  
3 (40) Curtis L, Burns A. Unit costs of health and social care 2017. Personal Social Service  
4 Research Unit, University of Kent, Canterbury 2017. [https://www.pssru.ac.uk/project-](https://www.pssru.ac.uk/project-pages/unit-costs/unit-costs-2017/)  
5 [pages/unit-costs/unit-costs-2017/](https://www.pssru.ac.uk/project-pages/unit-costs/unit-costs-2017/)  
6  
7

8 (41) Chan AW, Tetzlaff JM, Altman DG, et al. SPIRIT 2013 Statement: Defining standard  
9 protocol items for clinical trials. *Rev Panam Salud Publica* 2015;38:506–514.  
10  
11  
12  
13  
14  
15  
16  
17  
18  
19  
20  
21  
22  
23  
24  
25  
26  
27  
28  
29  
30  
31  
32  
33  
34  
35  
36  
37  
38  
39  
40  
41  
42  
43  
44  
45  
46  
47  
48  
49  
50  
51  
52  
53  
54  
55  
56  
57  
58  
59  
60

For peer review only

# Reporting checklist for protocol of a clinical trial.

Based on the SPIRIT guidelines.

## Instructions to authors

Complete this checklist by entering the page numbers from your manuscript where readers will find each of the items listed below.

Your article may not currently address all the items on the checklist. Please modify your text to include the missing information. If you are certain that an item does not apply, please write "n/a" and provide a short explanation.

Upload your completed checklist as an extra file when you submit to a journal.

In your methods section, say that you used the SPIRIT reporting guidelines, and cite them as:

Chan A-W, Tetzlaff JM, Altman DG, Laupacis A, Gøtzsche PC, Krleža-Jerić K, Hróbjartsson A, Mann H, Dickersin K, Berlin J, Doré C, Parulekar W, Summerskill W, Groves T, Schulz K, Sox H, Rockhold FW, Rennie D, Moher D. SPIRIT 2013 Statement: Defining standard protocol items for clinical trials. *Ann Intern Med.* 2013;158(3):200-207

|                    |                     |                                                                                                              | Page   |
|--------------------|---------------------|--------------------------------------------------------------------------------------------------------------|--------|
|                    |                     | Reporting Item                                                                                               | Number |
| Title              | <a href="#">#1</a>  | Descriptive title identifying the study design, population, interventions, and, if applicable, trial acronym | 1      |
| Trial registration | <a href="#">#2a</a> | Trial identifier and registry name. If not yet registered, name of intended registry                         | 4      |

|    |                     |                     |                                                          |            |
|----|---------------------|---------------------|----------------------------------------------------------|------------|
| 1  | Trial registration: | <a href="#">#2b</a> | All items from the World Health Organization Trial       | 1-26       |
| 2  |                     |                     |                                                          |            |
| 3  | data set            |                     | Registration Data Set                                    |            |
| 4  |                     |                     |                                                          |            |
| 5  |                     |                     |                                                          |            |
| 6  | Protocol version    | <a href="#">#3</a>  | Date and version identifier                              | 24         |
| 7  |                     |                     |                                                          |            |
| 8  |                     |                     |                                                          |            |
| 9  | Funding             | <a href="#">#4</a>  | Sources and types of financial, material, and other      | 25-26      |
| 10 |                     |                     | support                                                  |            |
| 11 |                     |                     |                                                          |            |
| 12 |                     |                     |                                                          |            |
| 13 |                     |                     |                                                          |            |
| 14 |                     |                     |                                                          |            |
| 15 | Roles and           | <a href="#">#5a</a> | Names, affiliations, and roles of protocol contributors  | 25         |
| 16 | responsibilities:   |                     |                                                          |            |
| 17 |                     |                     |                                                          |            |
| 18 | contributorship     |                     |                                                          |            |
| 19 |                     |                     |                                                          |            |
| 20 |                     |                     |                                                          |            |
| 21 |                     |                     |                                                          |            |
| 22 | Roles and           | <a href="#">#5b</a> | Name and contact information for the trial sponsor       | 24         |
| 23 | responsibilities:   |                     |                                                          |            |
| 24 |                     |                     |                                                          |            |
| 25 | sponsor contact     |                     |                                                          |            |
| 26 |                     |                     |                                                          |            |
| 27 | information         |                     |                                                          |            |
| 28 |                     |                     |                                                          |            |
| 29 |                     |                     |                                                          |            |
| 30 |                     |                     |                                                          |            |
| 31 |                     |                     |                                                          |            |
| 32 | Roles and           | <a href="#">#5c</a> | Role of study sponsor and funders, if any, in study      | 24-25      |
| 33 | responsibilities:   |                     | design; collection, management, analysis, and            |            |
| 34 |                     |                     | interpretation of data; writing of the report; and the   |            |
| 35 | sponsor and funder  |                     | decision to submit the report for publication, including |            |
| 36 |                     |                     | whether they will have ultimate authority over any of    |            |
| 37 |                     |                     | these activities                                         |            |
| 38 |                     |                     |                                                          |            |
| 39 |                     |                     |                                                          |            |
| 40 |                     |                     |                                                          |            |
| 41 |                     |                     |                                                          |            |
| 42 |                     |                     |                                                          |            |
| 43 |                     |                     |                                                          |            |
| 44 |                     |                     |                                                          |            |
| 45 |                     |                     |                                                          |            |
| 46 |                     |                     |                                                          |            |
| 47 | Roles and           | <a href="#">#5d</a> | Composition, roles, and responsibilities of the          | 19, 22, 24 |
| 48 | responsibilities:   |                     | coordinating centre, steering committee, endpoint        |            |
| 49 |                     |                     | adjudication committee, data management team, and        |            |
| 50 | committees          |                     | other individuals or groups overseeing the trial, if     |            |
| 51 |                     |                     | applicable (see Item 21a for data monitoring committee)  |            |
| 52 |                     |                     |                                                          |            |
| 53 |                     |                     |                                                          |            |
| 54 |                     |                     |                                                          |            |
| 55 |                     |                     |                                                          |            |
| 56 |                     |                     |                                                          |            |
| 57 |                     |                     |                                                          |            |
| 58 |                     |                     |                                                          |            |
| 59 |                     |                     |                                                          |            |
| 60 |                     |                     |                                                          |            |

|    |                      |                      |                                                          |           |
|----|----------------------|----------------------|----------------------------------------------------------|-----------|
| 1  | Background and       | <a href="#">#6a</a>  | Description of research question and justification for   | 5-7       |
| 2  |                      |                      |                                                          |           |
| 3  | rationale            |                      | undertaking the trial, including summary of relevant     |           |
| 4  |                      |                      |                                                          |           |
| 5  |                      |                      | studies (published and unpublished) examining benefits   |           |
| 6  |                      |                      |                                                          |           |
| 7  |                      |                      | and harms for each intervention                          |           |
| 8  |                      |                      |                                                          |           |
| 9  |                      |                      |                                                          |           |
| 10 |                      |                      |                                                          |           |
| 11 | Background and       | <a href="#">#6b</a>  | Explanation for choice of comparators                    | 5-6       |
| 12 |                      |                      |                                                          |           |
| 13 | rationale: choice of |                      |                                                          |           |
| 14 |                      |                      |                                                          |           |
| 15 | comparators          |                      |                                                          |           |
| 16 |                      |                      |                                                          |           |
| 17 |                      |                      |                                                          |           |
| 18 | Objectives           | <a href="#">#7</a>   | Specific objectives or hypotheses                        | 6-7       |
| 19 |                      |                      |                                                          |           |
| 20 |                      |                      |                                                          |           |
| 21 |                      |                      |                                                          |           |
| 22 | Trial design         | <a href="#">#8</a>   | Description of trial design including type of trial (eg, | 9         |
| 23 |                      |                      |                                                          |           |
| 24 |                      |                      | parallel group, crossover, factorial, single group),     |           |
| 25 |                      |                      |                                                          |           |
| 26 |                      |                      | allocation ratio, and framework (eg, superiority,        |           |
| 27 |                      |                      |                                                          |           |
| 28 |                      |                      | equivalence, non-inferiority, exploratory)               |           |
| 29 |                      |                      |                                                          |           |
| 30 |                      |                      |                                                          |           |
| 31 |                      |                      |                                                          |           |
| 32 | Study setting        | <a href="#">#9</a>   | Description of study settings (eg, community clinic,     | 11, 17-18 |
| 33 |                      |                      |                                                          |           |
| 34 |                      |                      | academic hospital) and list of countries where data will |           |
| 35 |                      |                      |                                                          |           |
| 36 |                      |                      | be collected. Reference to where list of study sites can |           |
| 37 |                      |                      |                                                          |           |
| 38 |                      |                      | be obtained                                              |           |
| 39 |                      |                      |                                                          |           |
| 40 |                      |                      |                                                          |           |
| 41 |                      |                      |                                                          |           |
| 42 | Eligibility criteria | <a href="#">#10</a>  | Inclusion and exclusion criteria for participants. If    | 9-10      |
| 43 |                      |                      |                                                          |           |
| 44 |                      |                      | applicable, eligibility criteria for study centres and   |           |
| 45 |                      |                      |                                                          |           |
| 46 |                      |                      | individuals who will perform the interventions (eg,      |           |
| 47 |                      |                      |                                                          |           |
| 48 |                      |                      | surgeons, psychotherapists)                              |           |
| 49 |                      |                      |                                                          |           |
| 50 |                      |                      |                                                          |           |
| 51 | Interventions:       | <a href="#">#11a</a> | Interventions for each group with sufficient detail to   | 10-12     |
| 52 |                      |                      |                                                          |           |
| 53 | description          |                      | allow replication, including how and when they will be   |           |
| 54 |                      |                      |                                                          |           |
| 55 |                      |                      | administered                                             |           |
| 56 |                      |                      |                                                          |           |
| 57 |                      |                      |                                                          |           |
| 58 |                      |                      |                                                          |           |
| 59 |                      |                      |                                                          |           |
| 60 |                      |                      |                                                          |           |

|    |                      |                      |                                                            |       |
|----|----------------------|----------------------|------------------------------------------------------------|-------|
| 1  | Interventions:       | <a href="#">#11b</a> | Criteria for discontinuing or modifying allocated          | N/A   |
| 2  |                      |                      |                                                            |       |
| 3  | modifications        |                      | interventions for a given trial participant (eg, drug dose |       |
| 4  |                      |                      | change in response to harms, participant request, or       |       |
| 5  |                      |                      | improving / worsening disease)                             |       |
| 6  |                      |                      |                                                            |       |
| 7  |                      |                      |                                                            |       |
| 8  |                      |                      |                                                            |       |
| 9  |                      |                      |                                                            |       |
| 10 |                      |                      |                                                            |       |
| 11 | Interventions:       | <a href="#">#11c</a> | Strategies to improve adherence to intervention            | 12    |
| 12 |                      |                      |                                                            |       |
| 13 | adherence            |                      | protocols, and any procedures for monitoring adherence     |       |
| 14 |                      |                      | (eg, drug tablet return; laboratory tests)                 |       |
| 15 |                      |                      |                                                            |       |
| 16 |                      |                      |                                                            |       |
| 17 |                      |                      |                                                            |       |
| 18 |                      |                      |                                                            |       |
| 19 | Interventions:       | <a href="#">#11d</a> | Relevant concomitant care and interventions that are       | N/A   |
| 20 |                      |                      | permitted or prohibited during the trial                   |       |
| 21 | concomitant care     |                      |                                                            |       |
| 22 |                      |                      |                                                            |       |
| 23 |                      |                      |                                                            |       |
| 24 | Outcomes             | <a href="#">#12</a>  | Primary, secondary, and other outcomes, including the      | 12-17 |
| 25 |                      |                      | specific measurement variable (eg, systolic blood          |       |
| 26 |                      |                      | pressure), analysis metric (eg, change from baseline,      |       |
| 27 |                      |                      | final value, time to event), method of aggregation (eg,    |       |
| 28 |                      |                      | median, proportion), and time point for each outcome.      |       |
| 29 |                      |                      | Explanation of the clinical relevance of chosen efficacy   |       |
| 30 |                      |                      | and harm outcomes is strongly recommended                  |       |
| 31 |                      |                      |                                                            |       |
| 32 |                      |                      |                                                            |       |
| 33 |                      |                      |                                                            |       |
| 34 |                      |                      |                                                            |       |
| 35 |                      |                      |                                                            |       |
| 36 |                      |                      |                                                            |       |
| 37 |                      |                      |                                                            |       |
| 38 |                      |                      |                                                            |       |
| 39 |                      |                      |                                                            |       |
| 40 |                      |                      |                                                            |       |
| 41 | Participant timeline | <a href="#">#13</a>  | Time schedule of enrolment, interventions (including any   | 17-18 |
| 42 |                      |                      | run-ins and washouts), assessments, and visits for         |       |
| 43 |                      |                      | participants. A schematic diagram is highly                |       |
| 44 |                      |                      | recommended (see Figure)                                   |       |
| 45 |                      |                      |                                                            |       |
| 46 |                      |                      |                                                            |       |
| 47 |                      |                      |                                                            |       |
| 48 |                      |                      |                                                            |       |
| 49 |                      |                      |                                                            |       |
| 50 |                      |                      |                                                            |       |
| 51 | Sample size          | <a href="#">#14</a>  | Estimated number of participants needed to achieve         | 12    |
| 52 |                      |                      | study objectives and how it was determined, including      |       |
| 53 |                      |                      | clinical and statistical assumptions supporting any        |       |
| 54 |                      |                      | sample size calculations                                   |       |
| 55 |                      |                      |                                                            |       |
| 56 |                      |                      |                                                            |       |
| 57 |                      |                      |                                                            |       |
| 58 |                      |                      |                                                            |       |
| 59 |                      |                      |                                                            |       |
| 60 |                      |                      |                                                            |       |

|    |                      |                      |                                                           |       |
|----|----------------------|----------------------|-----------------------------------------------------------|-------|
| 1  | Recruitment          | <a href="#">#15</a>  | Strategies for achieving adequate participant enrolment   | 17-18 |
| 2  |                      |                      | to reach target sample size                               |       |
| 3  |                      |                      |                                                           |       |
| 4  |                      |                      |                                                           |       |
| 5  |                      |                      |                                                           |       |
| 6  | Allocation: sequence | <a href="#">#16a</a> | Method of generating the allocation sequence (eg,         | 9     |
| 7  | generation           |                      | computer-generated random numbers), and list of any       |       |
| 8  |                      |                      | factors for stratification. To reduce predictability of a |       |
| 9  |                      |                      | random sequence, details of any planned restriction (eg,  |       |
| 10 |                      |                      | blocking) should be provided in a separate document       |       |
| 11 |                      |                      | that is unavailable to those who enrol participants or    |       |
| 12 |                      |                      | assign interventions                                      |       |
| 13 |                      |                      |                                                           |       |
| 14 |                      |                      |                                                           |       |
| 15 |                      |                      |                                                           |       |
| 16 |                      |                      |                                                           |       |
| 17 |                      |                      |                                                           |       |
| 18 |                      |                      |                                                           |       |
| 19 |                      |                      |                                                           |       |
| 20 |                      |                      |                                                           |       |
| 21 |                      |                      |                                                           |       |
| 22 |                      |                      |                                                           |       |
| 23 | Allocation           | <a href="#">#16b</a> | Mechanism of implementing the allocation sequence         | 9, 18 |
| 24 | concealment          |                      | (eg, central telephone; sequentially numbered, opaque,    |       |
| 25 |                      |                      | sealed envelopes), describing any steps to conceal the    |       |
| 26 | mechanism            |                      | sequence until interventions are assigned                 |       |
| 27 |                      |                      |                                                           |       |
| 28 |                      |                      |                                                           |       |
| 29 |                      |                      |                                                           |       |
| 30 |                      |                      |                                                           |       |
| 31 |                      |                      |                                                           |       |
| 32 |                      |                      |                                                           |       |
| 33 | Allocation:          | <a href="#">#16c</a> | Who will generate the allocation sequence, who will       | 9, 18 |
| 34 | implementation       |                      | enrol participants, and who will assign participants to   |       |
| 35 |                      |                      | interventions                                             |       |
| 36 |                      |                      |                                                           |       |
| 37 |                      |                      |                                                           |       |
| 38 |                      |                      |                                                           |       |
| 39 |                      |                      |                                                           |       |
| 40 |                      |                      |                                                           |       |
| 41 | Blinding (masking)   | <a href="#">#17a</a> | Who will be blinded after assignment to interventions     | 9, 18 |
| 42 |                      |                      | (eg, trial participants, care providers, outcome          |       |
| 43 |                      |                      | assessors, data analysts), and how                        |       |
| 44 |                      |                      |                                                           |       |
| 45 |                      |                      |                                                           |       |
| 46 |                      |                      |                                                           |       |
| 47 |                      |                      |                                                           |       |
| 48 | Blinding (masking):  | <a href="#">#17b</a> | If blinded, circumstances under which unblinding is       | N/A   |
| 49 | emergency            |                      | permissible, and procedure for revealing a participant's  |       |
| 50 |                      |                      | allocated intervention during the trial                   |       |
| 51 | unblinding           |                      |                                                           |       |
| 52 |                      |                      |                                                           |       |
| 53 |                      |                      |                                                           |       |
| 54 |                      |                      |                                                           |       |
| 55 |                      |                      |                                                           |       |
| 56 |                      |                      |                                                           |       |
| 57 |                      |                      |                                                           |       |
| 58 |                      |                      |                                                           |       |
| 59 |                      |                      |                                                           |       |
| 60 |                      |                      |                                                           |       |

|    |                        |                      |                                                             |       |
|----|------------------------|----------------------|-------------------------------------------------------------|-------|
| 1  | Data collection plan   | <a href="#">#18a</a> | Plans for assessment and collection of outcome,             | 12-18 |
| 2  |                        |                      | baseline, and other trial data, including any related       |       |
| 3  |                        |                      | processes to promote data quality (eg, duplicate            |       |
| 4  |                        |                      | measurements, training of assessors) and a description      |       |
| 5  |                        |                      | of study instruments (eg, questionnaires, laboratory        |       |
| 6  |                        |                      | tests) along with their reliability and validity, if known. |       |
| 7  |                        |                      |                                                             |       |
| 8  |                        |                      | Reference to where data collection forms can be found,      |       |
| 9  |                        |                      | if not in the protocol                                      |       |
| 10 |                        |                      |                                                             |       |
| 11 | Data collection plan:  | <a href="#">#18b</a> | Plans to promote participant retention and complete         | 18    |
| 12 | retention              |                      | follow-up, including list of any outcome data to be         |       |
| 13 |                        |                      | collected for participants who discontinue or deviate       |       |
| 14 |                        |                      | from intervention protocols                                 |       |
| 15 |                        |                      |                                                             |       |
| 16 | Data management        | <a href="#">#19</a>  | Plans for data entry, coding, security, and storage,        | 18-19 |
| 17 |                        |                      | including any related processes to promote data quality     |       |
| 18 |                        |                      | (eg, double data entry; range checks for data values).      |       |
| 19 |                        |                      | Reference to where details of data management               |       |
| 20 |                        |                      | procedures can be found, if not in the protocol             |       |
| 21 |                        |                      |                                                             |       |
| 22 | Statistics: outcomes   | <a href="#">#20a</a> | Statistical methods for analysing primary and secondary     | 19-21 |
| 23 |                        |                      | outcomes. Reference to where other details of the           |       |
| 24 |                        |                      | statistical analysis plan can be found, if not in the       |       |
| 25 |                        |                      | protocol                                                    |       |
| 26 |                        |                      |                                                             |       |
| 27 | Statistics: additional | <a href="#">#20b</a> | Methods for any additional analyses (eg, subgroup and       | N/A   |
| 28 | analyses               |                      | adjusted analyses)                                          |       |
| 29 |                        |                      |                                                             |       |
| 30 |                        |                      |                                                             |       |
| 31 |                        |                      |                                                             |       |
| 32 |                        |                      |                                                             |       |
| 33 |                        |                      |                                                             |       |
| 34 |                        |                      |                                                             |       |
| 35 |                        |                      |                                                             |       |
| 36 |                        |                      |                                                             |       |
| 37 |                        |                      |                                                             |       |
| 38 |                        |                      |                                                             |       |
| 39 |                        |                      |                                                             |       |
| 40 |                        |                      |                                                             |       |
| 41 |                        |                      |                                                             |       |
| 42 |                        |                      |                                                             |       |
| 43 |                        |                      |                                                             |       |
| 44 |                        |                      |                                                             |       |
| 45 |                        |                      |                                                             |       |
| 46 |                        |                      |                                                             |       |
| 47 |                        |                      |                                                             |       |
| 48 |                        |                      |                                                             |       |
| 49 |                        |                      |                                                             |       |
| 50 |                        |                      |                                                             |       |
| 51 |                        |                      |                                                             |       |
| 52 |                        |                      |                                                             |       |
| 53 |                        |                      |                                                             |       |
| 54 |                        |                      |                                                             |       |
| 55 |                        |                      |                                                             |       |
| 56 |                        |                      |                                                             |       |
| 57 |                        |                      |                                                             |       |
| 58 |                        |                      |                                                             |       |
| 59 |                        |                      |                                                             |       |
| 60 |                        |                      |                                                             |       |



|                                                                                                    |                                                        |                      |                                                                                                                                                                                                                                                                                                                                       |            |
|----------------------------------------------------------------------------------------------------|--------------------------------------------------------|----------------------|---------------------------------------------------------------------------------------------------------------------------------------------------------------------------------------------------------------------------------------------------------------------------------------------------------------------------------------|------------|
| 1<br>2<br>3<br>4<br>5<br>6<br>7<br>8<br>9<br>10                                                    | Statistics: analysis<br>population and<br>missing data | <a href="#">#20c</a> | Definition of analysis population relating to protocol non-adherence (eg, as randomised analysis), and any statistical methods to handle missing data (eg, multiple imputation)                                                                                                                                                       | 19-20      |
| 11<br>12<br>13<br>14<br>15<br>16<br>17<br>18<br>19<br>20<br>21<br>22<br>23<br>24<br>25<br>26<br>27 | Data monitoring:<br>formal committee                   | <a href="#">#21a</a> | Composition of data monitoring committee (DMC); summary of its role and reporting structure; statement of whether it is independent from the sponsor and competing interests; and reference to where further details about its charter can be found, if not in the protocol. Alternatively, an explanation of why a DMC is not needed | 19, 22, 24 |
| 28<br>29<br>30<br>31<br>32<br>33<br>34<br>35<br>36<br>37                                           | Data monitoring:<br>interim analysis                   | <a href="#">#21b</a> | Description of any interim analyses and stopping guidelines, including who will have access to these interim results and make the final decision to terminate the trial                                                                                                                                                               | N/A        |
| 38<br>39<br>40<br>41<br>42<br>43<br>44<br>45<br>46<br>47                                           | Harms                                                  | <a href="#">#22</a>  | Plans for collecting, assessing, reporting, and managing solicited and spontaneously reported adverse events and other unintended effects of trial interventions or trial conduct                                                                                                                                                     | 22         |
| 48<br>49<br>50<br>51<br>52<br>53<br>54                                                             | Auditing                                               | <a href="#">#23</a>  | Frequency and procedures for auditing trial conduct, if any, and whether the process will be independent from investigators and the sponsor                                                                                                                                                                                           | N/A        |
| 55<br>56<br>57<br>58<br>59<br>60                                                                   | Research ethics<br>approval                            | <a href="#">#24</a>  | Plans for seeking research ethics committee / institutional review board (REC / IRB) approval                                                                                                                                                                                                                                         | 22         |

|    |                    |                      |                                                            |     |
|----|--------------------|----------------------|------------------------------------------------------------|-----|
| 1  | Protocol           | <a href="#">#25</a>  | Plans for communicating important protocol                 | 24  |
| 2  |                    |                      |                                                            |     |
| 3  | amendments         |                      | modifications (eg, changes to eligibility criteria,        |     |
| 4  |                    |                      | outcomes, analyses) to relevant parties (eg,               |     |
| 5  |                    |                      | investigators, REC / IRBs, trial participants, trial       |     |
| 6  |                    |                      | registries, journals, regulators)                          |     |
| 7  |                    |                      |                                                            |     |
| 8  |                    |                      |                                                            |     |
| 9  |                    |                      |                                                            |     |
| 10 |                    |                      |                                                            |     |
| 11 |                    |                      |                                                            |     |
| 12 |                    |                      |                                                            |     |
| 13 | Consent or assent  | <a href="#">#26a</a> | Who will obtain informed consent or assent from            | 22  |
| 14 |                    |                      | potential trial participants or authorised surrogates, and |     |
| 15 |                    |                      | how (see Item 32)                                          |     |
| 16 |                    |                      |                                                            |     |
| 17 |                    |                      |                                                            |     |
| 18 |                    |                      |                                                            |     |
| 19 |                    |                      |                                                            |     |
| 20 |                    |                      |                                                            |     |
| 21 | Consent or assent: | <a href="#">#26b</a> | Additional consent provisions for collection and use of    | N/A |
| 22 |                    |                      | participant data and biological specimens in ancillary     |     |
| 23 | ancillary studies  |                      | studies, if applicable                                     |     |
| 24 |                    |                      |                                                            |     |
| 25 |                    |                      |                                                            |     |
| 26 |                    |                      |                                                            |     |
| 27 |                    |                      |                                                            |     |
| 28 | Confidentiality    | <a href="#">#27</a>  | How personal information about potential and enrolled      | 19  |
| 29 |                    |                      | participants will be collected, shared, and maintained in  |     |
| 30 |                    |                      | order to protect confidentiality before, during, and after |     |
| 31 |                    |                      | the trial                                                  |     |
| 32 |                    |                      |                                                            |     |
| 33 |                    |                      |                                                            |     |
| 34 |                    |                      |                                                            |     |
| 35 |                    |                      |                                                            |     |
| 36 |                    |                      |                                                            |     |
| 37 |                    |                      |                                                            |     |
| 38 | Declaration of     | <a href="#">#28</a>  | Financial and other competing interests for principal      | 26  |
| 39 |                    |                      | investigators for the overall trial and each study site    |     |
| 40 | interests          |                      |                                                            |     |
| 41 |                    |                      |                                                            |     |
| 42 |                    |                      |                                                            |     |
| 43 |                    |                      |                                                            |     |
| 44 | Data access        | <a href="#">#29</a>  | Statement of who will have access to the final trial       | 19  |
| 45 |                    |                      | dataset, and disclosure of contractual agreements that     |     |
| 46 |                    |                      | limit such access for investigators                        |     |
| 47 |                    |                      |                                                            |     |
| 48 |                    |                      |                                                            |     |
| 49 |                    |                      |                                                            |     |
| 50 |                    |                      |                                                            |     |
| 51 | Ancillary and post | <a href="#">#30</a>  | Provisions, if any, for ancillary and post-trial care, and | N/A |
| 52 |                    |                      | for compensation to those who suffer harm from trial       |     |
| 53 | trial care         |                      | participation                                              |     |
| 54 |                    |                      |                                                            |     |
| 55 |                    |                      |                                                            |     |
| 56 |                    |                      |                                                            |     |
| 57 |                    |                      |                                                            |     |
| 58 |                    |                      |                                                            |     |
| 59 |                    |                      |                                                            |     |
| 60 |                    |                      |                                                            |     |

|    |                       |                      |                                                           |            |
|----|-----------------------|----------------------|-----------------------------------------------------------|------------|
| 1  | Dissemination         | <a href="#">#31a</a> | Plans for investigators and sponsor to communicate trial  | 22-23      |
| 2  |                       |                      |                                                           |            |
| 3  | policy: trial results |                      | results to participants, healthcare professionals, the    |            |
| 4  |                       |                      | public, and other relevant groups (eg, via publication,   |            |
| 5  |                       |                      | reporting in results databases, or other data sharing     |            |
| 6  |                       |                      | arrangements), including any publication restrictions     |            |
| 7  |                       |                      |                                                           |            |
| 8  |                       |                      |                                                           |            |
| 9  |                       |                      |                                                           |            |
| 10 |                       |                      |                                                           |            |
| 11 |                       |                      |                                                           |            |
| 12 |                       |                      |                                                           |            |
| 13 | Dissemination         | <a href="#">#31b</a> | Authorship eligibility guidelines and any intended use of | N/A        |
| 14 |                       |                      |                                                           |            |
| 15 | policy: authorship    |                      | professional writers                                      |            |
| 16 |                       |                      |                                                           |            |
| 17 |                       |                      |                                                           |            |
| 18 |                       |                      |                                                           |            |
| 19 | Dissemination         | <a href="#">#31c</a> | Plans, if any, for granting public access to the full     | N/A        |
| 20 |                       |                      |                                                           |            |
| 21 | policy: reproducible  |                      | protocol, participant-level dataset, and statistical code |            |
| 22 |                       |                      |                                                           |            |
| 23 | research              |                      |                                                           |            |
| 24 |                       |                      |                                                           |            |
| 25 |                       |                      |                                                           |            |
| 26 | Informed consent      | <a href="#">#32</a>  | Model consent form and other related documentation        | On         |
| 27 |                       |                      |                                                           |            |
| 28 | materials             |                      | given to participants and authorised surrogates           | request    |
| 29 |                       |                      |                                                           |            |
| 30 |                       |                      |                                                           |            |
| 31 |                       |                      |                                                           | from study |
| 32 |                       |                      |                                                           |            |
| 33 |                       |                      |                                                           | team       |
| 34 |                       |                      |                                                           |            |
| 35 |                       |                      |                                                           |            |
| 36 | Biological            | <a href="#">#33</a>  | Plans for collection, laboratory evaluation, and storage  | N/A        |
| 37 |                       |                      |                                                           |            |
| 38 | specimens             |                      | of biological specimens for genetic or molecular analysis |            |
| 39 |                       |                      |                                                           |            |
| 40 |                       |                      |                                                           |            |
| 41 |                       |                      |                                                           |            |
| 42 |                       |                      |                                                           |            |
| 43 |                       |                      |                                                           |            |
| 44 |                       |                      |                                                           |            |
| 45 |                       |                      |                                                           |            |
| 46 |                       |                      |                                                           |            |
| 47 |                       |                      |                                                           |            |
| 48 |                       |                      |                                                           |            |
| 49 |                       |                      |                                                           |            |
| 50 |                       |                      |                                                           |            |
| 51 |                       |                      |                                                           |            |
| 52 |                       |                      |                                                           |            |
| 53 |                       |                      |                                                           |            |
| 54 |                       |                      |                                                           |            |
| 55 |                       |                      |                                                           |            |
| 56 |                       |                      |                                                           |            |
| 57 |                       |                      |                                                           |            |
| 58 |                       |                      |                                                           |            |
| 59 |                       |                      |                                                           |            |
| 60 |                       |                      |                                                           |            |

The SPIRIT checklist is distributed under the terms of the Creative Commons Attribution License CC-BY-ND 3.0. This checklist can be completed online using <https://www.goodreports.org/>, a tool made by the [EQUATOR Network](#) in collaboration with [Penelope.ai](#)
